# Supplementary material for: Variability in Above and Belowground Carbon Stocksin a Siberian Larch Watershed
Source: Copernicus journal article supplement (doi:10.5194/bg-2017-88), 2017-04-03
Supplement: Supplementary file [file bg-2017-88-AC1-supplement.pdf]

We appreciate the input from the editor and from both reviewers, which we feel has made this a stronger manuscript. Our responses to the reviewers' comments follow each comment and are in italicized font. The line numbers referenced in our responses refer to the updated manuscript text, which is attached.

There were some comments by reviewer #2 that seem to have mismatched line numbers (based on the submitted version of the manuscript). We were able to resolve many of these comments, but for some comments it was not clear what text the comments referred. We would be grateful for an opportunity to address these comments after further clarification.

Best,  
Sue Natali

### **Responses to Reviewer 1**

It is clear throughout the text that the main emphasis was on the aboveground biomass. What I lack is the same accuracy and description for the fewer belowground carbon samples, especially for the 7 surface permafrost cores. As a reader I want to know for example: was the coring and the analysis of the 60 cm cores in short increments?

*The text has been edited at lines 227 to clarify that the cores were sectioned into ~10cm increments, and a Supplement Table has been added with depth increment data.*

How were the 7 sampling sites selected?

*The seven sites where surface permafrost was sampled were a subset of the 20 sampled stands; these seven sites were selected based on accessibility and distribution across the catchment. The 20 stands (i.e. 'sites') were selected to span a range of tree aboveground biomass, as inferred from tree shadows mapped using high-resolution (50 cm) WorldView-1 satellite imagery (Lines 134-136).*

Any signs of cryoturbation, data on soil texture, etc.

*We did not collect data on cryostructure or texture, unfortunately.*

Why do you think there is so little carbon in your top meter compared to the results from many other studies?

*We noted in lines 382-382 that these soil C pool estimates fall within the range of published assessments that characterize this area (i.e., forested area around Cherskiy). However, they are at the low end of the larger region, although within one SD of the regional mean. This may be a result of variation in parent material, disturbance (fire or harvest), or other soil conditions. This assessment, however, is beyond the scope of this study.*

In addition, I suggest that you add the SOC data from the first meter from the two deep cores which are part of the watershed to the other permafrost cores. This additional data will most likely increase the 1m average which will then be similar to many other cited studies.

*We added the 1m SOC data from the two deep cores to the average SOC value presented in the text (line 333-334). In the text, we presented average (+-SE) SOM both with just*

*the yedoma deep core added (because much of the manuscript focuses on yedoma C pools), and then with both the yedoma and alas deep core data added. Figure 2 has been updated with the additional data from the deep yedoma core.*

You have nice supplementary data but I lack the information from the permafrost cores in the data.

*These have been added in Supplement Table 4.*

Since the samples were also analyzed for nitrogen (Line 223), why did you not further incorporate this data in the text?

*We were only able to analyze a subset of soils for C and N because of challenges of transporting international soils. We were able to extrapolate %C, based on C-SOM relationship, to the full dataset, but not possible for %N. Inclusion of N analyses in the methods section was done in error, and we have removed this text.*

Also, given the sampling and measurement uncertainties, I think is unnecessary to present the soil C values in grams, especially since you shift to kg from line 308 in the text.

*Agree. The soil units in the text are in kg, and Table 4 now also is in kg C/m<sup>2</sup>.*

#### Specific Comments

- Line 288: Comma used for decimals

*These actually should be commas, not decimals. No change made.*

- Line 296: I suppose the SE should be  $\pm$ ?

*Yes. We have corrected.*

- Line 346: Please remove the word “slightly”.

*Done.*

- Line 385: How many permafrost soils were sampled: 21 or 7? I miss this information in the section 2.7. Since it is stated in the description of Table 4 “. . .at selected sites, but not on the transects. . .”?

*We collected three cores at 7 sites for a total of 21 'surface permafrost cores. We edited the table description to read: " Permafrost cores were sampled to 1 m at 7 sites (3/site). ", and clarified the number of samples per site in section 2.8 on line 212.*

- Line 640: Typo “Author(s)”

*Corrected-thanks.*

- Table 2 & 3: Site number 18 is not forested as stated in table 1, why are there values for larch/larch density?

*We corrected table 1 description to read: " All sites were in forested areas except #17 (riparian); Site #18 (alas) had few scattered trees located along one end of the transects. "*

- Table 4: Would be good to indicate the n for the values since they are different

*We have indicated the sample size in the table description.*

- Table 4 & 5: Please add in the title “of the mean” as in others tables  
*Added.*

## Responses to Reviewer #2

The weak points in the manuscript are in my opinion a somewhat confusing sampling scheme or its description, and an underdeveloped discussion that does not challenge the perspective of the authors. In particular, the authors see vegetation as a primary driver for total C storage, despite the fact that the vast majority of the C is stored in soil and moisture is identified as a major driver of C stocks. To round up the discussion, the authors should also consider that vegetation is merely a reaction to ground conditions and soil forming processes or topographic drivers. Further there is clearly a bias towards the description of vegetation analysis, while the description of the soil sampling and the discussion on soil related aspects is underdeveloped. Please rewrite the sampling description and/or provide a graph outlining the sampling procedure. This is important, because the C variability is one of your major conclusions.

*The two main suggestions of this reviewer focus on description of the soil sampling and discussion of the drivers of soil C stocks. To address these concerns:*

- 1. We edited the methods section and added a supplemental figure, Figure S1.*
- 2. Text discussion of soil moisture effects and reference can be found on lines 442-445*

Minor comments:

L 22 What is snag?

*A snag is standing dead or dying tree.*

L 23- 24 rephrase

*Done. Sentence now reads: "Thaw depth was negatively related to stand age, and soil C density (top 10 cm) was positively related to soil moisture and negatively related to moss and lichen cover."*

L 45 – 50 How about thermokarst?

*We changed 'microtopography' to 'topography', and one of the references following that is a thermokarst reference.*

L 58 See also Vitharana et al. (2017) AGU:bgs

*Thanks for suggesting. We added this reference to this manuscript and changed that sentence to read: " Furthermore, permafrost regions are characterized by high heterogeneity in soil C stocks due to variability in soil-forming factors (Vitharana et al., 2017) and at small spatial scales due to cryogenic processes (i.e., cryoturbation at the sub-meter scale)."*

L 63 – 65 What do you mean by high resolution sampling and what does this have to do with circumpolar estimates? Also, Walter Anthony et al. (2014) is a paper on thermokarst lake deposits and C accumulation over the Holocene and has nothing to do with soil.

*By high resolution we mean that spatial resolution of the sampling should match the spatial resolution of the variability. We edited the sentence, and we deleted the Walter Anthony reference.*

L 70 Yedoma is a sedimentological Suite and not soil, or do you mean the soil developed on top of these Yedoma deposits?

*We changed 'soil' to 'deposits'.*

L 72 25m: clearly you cite a number that in Tarnocai et al. 1999 is cited as Zimov et al. 2006 ! then cite Zimov et al 2006, or find a more up-to-date number

*If you are referring to the reference to Tarnocai 2009 on line 66 then we have made the suggested change. If that is not correct, then please clarify and we will make further changes as suggested.*

## Section 2.2

I am sorry, but this section is a bit confusing. Add reference to Fig 1.

*Agree. First, we moved the stand age sampling into its own section and moved the stand age and density results into the results section. We cleaned up and clarified the rest of the text in this section. We also added in reference to Figure 1.*

Did you sample random? If not, then please justify why not and how this could be a bias in your study.

*We clarified section 2.2 to note that sites were selected based on biomass distribution; while plots within sites were established based on slope or N-S direction to avoid bias.*

L 142 what is the logic behind this? Please explain.

*I think there is some confusion regarding line numbering; please clarify so that we can address this comment.*

*Lines 141-143 read: " Wood samples were dried at 60 °C and then sanded sequentially with finer grit sizes to obtain a smooth surface. Each sample was then scanned and the annual growth rings were counted using WinDendro (Regent Instruments, Inc., Ontario)."*

L 145 – 147 Please rewrite and provide a figure that explains your sampling scheme.

*We added a supplemental figure and edited the text.*

Section 2.3 what is the motivation for this?

*To explore effects of slope and solar insolation on soil C pools.*

L 171 Did you correct your allometric functions for reduced C content in decomposed dead trees? (see for instance Smith et al 2003 GTR report:Forest volume-to-biomass models ...)

*We did not for snags but did for downed dead trees (line 183-185). Dead standing larch had little observable decay.*

L 193 Are these values also valid for Larch trees?

*We used value for similar structured trees, following methods in previously published studies, as cited; ideally, if available, we would use for larch.*

L 218 What soil How did you select the sampling location with regard to microtopography. Did you have hummocks in the soil? See also Ping (2013) Soil Horiz.

There were no hummocks at these locations. Soils were sampled at either end of each of the three transects (line 213-214; Figure S1) so they were distributed across each site at ~10m distance.

L 213 Please provide more precise constraining dates for the active layer thickness  
*We added dates to the text at line 204.*

L 222 again, it is very unclear how you sampled this and how many samples and soil profiles go into one site. This is important to be clarified because an important part of your discussion and your conclusions are based on the variability of these values. What do you mean by 6 samples one at each end of a transect?

*We edited the soil sampling and analysis section to clarify and added a Supplemental figure.*

L 224 If you only collected the top 10 cm of mineral soil you have a bias towards C enriched upper soil. This can be problematic if you interpolated to deeper depths. If this is the case, please discuss this and outline potential impacts on your statistics.  
*We did not interpolate. At the 7 sites where we sampled frozen soils, we collected the full mineral soil profile (lines 217-218) as well as frozen soil. We only used these deeper samples for the deeper estimates.*

L 239 Which guidelines did you follow for this?

*I think there is some confusion regarding line numbering; please clarify so that we can address this comment.*

*Lines 238-239 on the submitted manuscript read: "For the deep permafrost samples, sub-samples used for %C, %OM, and BD measurements were collected from adjacent depth increments"*

L 297 and 301 Please use the same units for masses throughout the article. I suggest kg C m<sup>-2</sup>

*All soil units have been changed to kg C m<sup>-2</sup>.*

L 304 what could this variability be related to?

*Please clarify the line number or specify the text that you are referencing.*

L 319 Do you mean you started sampling at 0 cm from the top to 10 cm depth or the top 10 cm of the mineral soil?

*We are referring to the top 10 cm of the ground surface, not the top of the mineral soil. We have clarified this in the text (lines 322-323) to read: "Soil C density in the top 10 cm of the ground surface (0-10 cm soil depth, which may have contained both organic and mineral soils)..."*

L 352 I don't see this.

*Please clarify the line number or text this is referencing; it's not clear what changes are suggested to line 352.*

*Line 350-352 read: "In addition, our larch AGB estimates fell within the low range of larch stands across other high-latitude ( $> 64^{\circ}$  N) regions and were generally 3-10 times lower than other stands (Kajimoto et al., 2010) "*

L 406 Also have a look at Siewert et al (2015) AGU:bgs for a comparable study to yours.

*Thank you for the suggestion. Reference has been incorporated at line 425.*

L 407 What explains this high variation in your case?

*Assuming this refers to line 394, I don't think we have enough samples/information to conduct this analysis, but much of the variation may have been driven by high and variable ice content.*

L 420 Please mention that Yakutia spans over a large area with many ecosystem types. We added text to note that the region comprises a diverse range of ecosystem types.

L 428 again, Yedomia is not a soil type

*We have corrected throughout the text.*

L 448 What do you mean by geophysical controls?

*We changed 'geophysical' to 'parent material and climate'. These factors were not the focus of the discussion as the sites were located within a small catchment with similar parent material and climate.*

L 459 Please also consider the notion that moist sites support more vegetation that is more productive and stores more C, rather than vegetation driven differences in moisture and thus C

*We edited the text at lines 442-445 to address this comment and added a reference to Berner et al (2013).*

L 471 related -to- stand age

*Corrected.*

Fig 2: Organic Layer stocks would also be interesting  
*Organic layer carbon stocks are provided in Figure 4.*

Table 4 What do you mean by soil classification? Mineral or organic? Or soil type (Podsol, etc...)

*We clarified to read "soil type (mineral/organic)"*

Please use the same units thorough the paper! Here it is g Cm <sup>-2</sup> before it was kg cm<sup>-2</sup>  
*All soils are now in units of kg C m<sup>-2</sup>.*

Why is the standard error the same for both columns of the permafrost cores? Are the

permafrost cores also including the active layer?

*The SEs were an error, which have now been corrected--thank you for catching this. The columns under 'thawed soil cores' are thawed active layer. The permafrost core data presented are C pools in the top 0-30cm of ground or C pools in the top 100 cm of ground. We edited the table description to clarify.*



**Variability in Above and Belowground Carbon Stocks  
in a Siberian Larch Watershed**

Elizabeth E. Webb

Woods Hole Research Center, 149 Woods Hole Road, Falmouth, MA, 02540

Kathryn Heard

Western Washington University, 516 High Street, Bellingham, WA 98225  
Bellingham, Washington

Susan M. Natali\*

Woods Hole Research Center, 149 Woods Hole Road, Falmouth, MA, 02540

Andrew G. Bunn

Department of Environmental Science, Western Washington University, 516 High  
Street, Bellingham, WA 98225

Heather D. Alexander

Department of Forestry, Forest and Wildlife Research Center, Mississippi State  
University, MS 39762

Logan T. Berner

School of Informatics, Computing, and Cyber Systems, Northern Arizona  
University, Flagstaff, AZ 86011

Alexander Kholodov

University of Alaska, 903 Koyukuk Dr., Fairbanks, AK, 99775  
Institute of Physical-Chemical and Biological Problems of Soil Science RAS, 2  
Institutskaya str., Pushchino, Russia.

Michael M. Loranty

Department of Geography, Colgate University, 13 Oak Dr, Hamilton, New York  
13346

John D. Schade

Woods Hole Research Center, 149 Woods Hole Road, Falmouth, MA, 02540

Valentin Spektor,

Melnikov Permafrost Institute, Siberian Branch of the Russian Academy of  
Sciences, Yakutsk, Siberia

Nikita Zimov

Northeast Science Station, Cherskiy, Russia

\*Corresponding author. Please direct correspondence to [snatali@whrc.org](mailto:snatali@whrc.org)

## 1    **ABSTRACT**

2            Permafrost soils store between 1,330-1,580 Pg carbon (C), which is three times the  
3    amount of C in global vegetation, almost twice the amount of C in the atmosphere, and half of  
4    the global soil organic C pool. Despite the massive amount of C in permafrost, estimates of soil  
5    C storage in the high latitude permafrost region are highly uncertain, primarily due to under  
6    sampling at all spatial scales; circumpolar soil C estimates lack sufficient continental spatial  
7    diversity, regional intensity, and replication at the field-site level. Siberian forests are  
8    particularly under sampled, yet the larch forests that dominate this region may store more than  
9    twice as much soil C as all other boreal forest types in the continuous permafrost zone combined.  
10   Here we present above and belowground C stocks from twenty sites representing a gradient of  
11   stand age and structure in a larch watershed of the Kolyma River near Cherskiy, Sakha Republic,  
12   Russia. We found that the majority of C stored in the top 1 m of the watershed was stored  
13   belowground (92%), with 19% in the top 10 cm of soil and 40% in the top 30 cm. Carbon was  
14   more variable in surface soils (10 cm; coefficient of variation (CV) = 0.35 between stands) than  
15   in the top 30 cm (CV=0.14) or soil profile to 1 m (CV=0.20). Combined active layer and deep  
16   frozen deposits (surface - 15 m) contained 205 kg C m<sup>-2</sup> (yedoma, non-ice wedge) and 331 kg C  
17   m<sup>-2</sup> (alas), which, even when accounting for landscape-level ice content, is an order of magnitude  
18   more C than that stored in the top meter of soil and two orders of magnitude more C than in  
19   aboveground biomass. Aboveground biomass was composed of primarily larch (53%) but also  
20   included understory vegetation (30%), woody debris (11%) and snag (6%) biomass. While  
21   aboveground biomass contained relatively little (8%) of the C stocks in the watershed,  
22   aboveground processes were linked to thaw depth and belowground C storage. Thaw depth was  
23   negatively related to stand age, and soil C density (top 10 cm) was positively related to soil

24 moisture and negatively related to moss and lichen cover. These results suggest that as the  
25 climate warms, changes in stand age and structure may be as important as direct climate effects  
26 on belowground environmental conditions and permafrost C vulnerability.

27

## 1 INTRODUCTION

Boreal forests cover roughly 22% of the earth's terrestrial landscape (Chapin et al., 2000) and account for approximately 9% of the global vegetation carbon (C) stock (Carvalhais et al., 2014). Most of the C in boreal forests, however, is stored in the soil (Pan et al., 2011), where cold and wet conditions have limited microbial decomposition, and as a result, C has accumulated over the past several millennia (Hobbie et al., 2000; Trumbore and Harden, 1997). Recent estimates suggest that continuous and discontinuous permafrost in the boreal region store around 137 Pg, or 40% of near surface permafrost (< 1 m) C (Lorant et al., 2016). Despite the massive amount of C present in the boreal region, the quantity of C stored here and the magnitude of the change in C stocks that will result from climate change is one of the least understood carbon-climate feedbacks (Schuur et al., 2015).

Over the past fifty years, air temperatures in the Arctic have risen nearly twice the global average as a result of climate change (Christensen et al., 2013), and this accelerated rate of warming means that the vast amount of C stored in high latitude systems is vulnerable to loss to the atmosphere (Koven et al., 2015; Schuur et al., 2015). The amount of C released as a result of thaw will be highly dependent on concurrent changes in topography and hydrology (Liljedahl et al., 2016; Schneider Von Deimling et al., 2015), vegetation (Guay et al., 2014; Sturm et al., 2005) fire regimes (Berner et al., 2012; Kasischke and Turetsky, 2006; Rogers et al., 2015; Soja et al., 2007), nutrient availability (Mack et al., 2004; Salmon et al., 2016) as well as soil C lability (Harden et al., 2012; Schädel et al., 2014). Yet despite the vulnerability of permafrost soils to increased thaw and C release due to climate change, there is a lack of data quantifying the C stocks in northern latitudes compared to other regions.

Permafrost C pool estimates tend to be dominated by sites located in Alaska or western Russia, with very few data points from the Russian low Arctic or Canadian high Arctic (Hugelius et al., 2014; Tarnocai et al., 2009). As a result, many regions are under-represented in circumpolar permafrost C estimates (Hugelius et al., 2014; Johnson et al., 2011; Mishra et al., 2013; Tarnocai et al., 2009). Even in Alaska, which is one of the most densely sampled Arctic sub-regions, Mishra and Riley (2012) found that the current sample distribution is insufficient to characterize regional soil organic C (SOC) stocks fully because of SOC variation across vegetation types, topography, and parent material. Furthermore, permafrost regions are characterized by high heterogeneity in soil C stocks due to variability in soil-forming factors (Vitharana et al., 2017) and at small spatial scales due to cryogenic processes (i.e., cryoturbation at the sub-meter scale). As a result, sampling at higher spatial resolution may provide more accurate estimates of soil C stocks (Johnson et al., 2011; Tarnocai et al., 2009). Therefore, understanding variation in soil properties at the meter scale is critical for reducing uncertainty in estimates of current and future permafrost carbon pools (Beer, 2016).

Pleistocene-aged, C and ice rich permafrost (i.e. yedoma) deposits occur across Siberia and Alaska (Strauss et al., 2013) and are particularly important for regional soil C estimates. Yedoma deposits froze relatively quickly in geologic history (Schirrmeister et al., 2011; Zimov et al., 2006), and as a consequence, these deep deposits (on average 25 m; Zimov et al. 2006) are C rich compared to other permafrost soils (Strauss et al., 2013; Zimov et al., 2006). Approximately 30% of high latitude permafrost C is found in these yedoma deposits, even though they comprise only 7% of the landscape (Walter Anthony et al., 2014). However, due to limited sampling of deep (> 3 m) permafrost, establishing how much C is in these deposits is

difficult, leading to high uncertainty in estimates of soil C pools in yedoma deposits (Strauss et al., 2013; Walter Anthony et al., 2014).

While vegetation stores a relatively small portion of the C pool in boreal forests (approximately 20%; Pan et al., 2011), it plays a crucial role in local and global C cycling, and many future changes in C fluxes in this biome will likely occur as a result of changes in vegetation (Elmendorf et al., 2012; Euskirchen et al., 2009; Myers-Smith et al., 2015; Swann et al., 2010). With increased temperatures, boreal forests are susceptible to insect invasions (Berg et al., 2006; Kurz et al., 2008), moisture stress (Beck et al., 2011; Trahan and Schubert, 2016; Walker et al., 2015), tree line advance and retrogression (Lloyd, 2005; Pearson et al., 2013), and more frequent forest fires (Kasischke and Turetsky, 2006; Rogers et al., 2015; Soja et al., 2007), which all have the potential to alter C cycling significantly in the region. Importantly, climate-change driven alterations in forest cover, composition, and structure will influence regional energy balance through impacts on surface albedo, evapotranspiration, and ground insulation, which will in turn affect ground thaw and soil C cycling (Chapin et al., 2005; Euskirchen et al., 2009; Fisher et al., 2016; Jean and Payette, 2014; Loranty et al., 2014).

However, the aboveground processes that regulate C dynamics are not homogenous throughout the boreal biome (Goetz et al., 2007). For example, the fire regimes of larch (*Larix spp.*) and pine (*Pinus sylvestris*) forests in Siberia are typically dominated by low to medium intensity fires whereas dark coniferous forests common in Alaska and Canada are characterized by higher intensity and severity fires (Rogers et al., 2015; Soja et al., 2006, 2007; Tautenhahn et al., 2016). The dynamics of larch forests are particularly important, as they store more than twice the amount of SOC of all other boreal forest types in the continuous permafrost zone combined (Loranty et al., 2016). Despite this, larch forests in Siberia are notably under studied;

indeed, the estimate of C stored in Russian forests is the least well constrained of all forest systems globally (Shuman et al., 2013).

In this study, we aim to reduce the uncertainty of regional C estimates by providing a comprehensive assessment of vegetation, active layer, and permafrost C stocks in the Kolyma River watershed in Northeast Siberia, Russia. We present aboveground and belowground (to 1 m) C stocks from data collected from 20 sites across the watershed along with deep permafrost C pools to 15 m depth from a yedoma deposit and an alas (thermokarst depression). We compare variation in soil C pools at meter to kilometer scales in order to quantify the variability of permafrost C at small spatial scales. Additionally, we examine the drivers of thaw depth and C density of active layer soils to understand environmental controls over these variables across the watershed. Together, these analyses allow us to estimate C pools and controls over changes in these pools that will likely occur with climate change.

## **2 METHODS**

### **2.1 Site description**

Our study area was a watershed ('Y4 watershed', ~3 km<sup>2</sup>; Figure 1) located within the Kolyma River basin, which is the largest river basin (650,000 km<sup>2</sup>) completely underlain by continuous permafrost (Holmes et al., 2012). The Y4 watershed is located near Cherskiy, Sakha Republic, Russia approximately 130 km south of the Arctic Ocean and is underlain by yedoma, which is widespread across the region (Grosse et al., 2013). The climate is continental with short, warm summers (Jul avg: 12 °C) and long, cold winters (Jan avg: -33 °C). Annual precipitation is low (~230 mm) and often occurs during summer (Cherskiy Meteorological Station; S. Davydov,

unpub data). Mean summer temperatures in this region increased by 1°C from 1938 to 2009 (Berner et al., 2013).

There are two main types of cryogenic deposits within the watershed. Upland areas are Late Pleistocene syncryogenic ice rich deposits of yedoma. Drained thaw lake depressions are underlain by alas consisting of lacustrine-wetland sediments in the upper pedon and taberal (i.e. yedoma that thawed in a talik) deposits in the lower part of the profile. Permafrost temperatures at 15 m vary from -2.8°C at the hilltops with relatively thin organic layers to -4°C in thermokarst depressions with thick (up to 20 cm) moss and peat layers (A. Kholodov, unpub data).

Forests in the watershed are composed of a single larch species, *Larix cajanderi*, with a well-developed understory of deciduous shrubs (primarily *Betula nana*, *Salix* spp., and *Vaccinium uliginosum*), evergreen shrubs (e.g. *Vaccinium vitis-idaea*, *Empetrum nigrum*, *Rhododendron subarcticum*), forbs (e.g., *Equisetum scirpoides*, *Pyrola* spp., and *Valeriana capitata*), graminoids (*Calamagrostis* spp.), moss (e.g. *Aulacomnium palustre*, *Dicranum* spp., and *Polytrichum* spp ), and lichen (e.g. *Cladonia* spp, *Peltigera aphthosa*, and *Flavocetraria cucullata*).

## 2.2 Site selection and sampling design

We selected 20 stands (i.e. ‘sites’) in the Y4 watershed that spanned a range of tree aboveground biomass, as inferred from tree shadows mapped using high-resolution (50 cm) WorldView-1 satellite imagery (Berner et al., 2012; Figure 1). All sites were located in forested stands except for one in a *Salix*-dominated riparian zone (Site 17) and another in a *Sphagnum*-dominated alas (Site 18; Table 1). Within each site, we established three 20 m long by 2 m wide plots, each of which was separated by 8 m and ran parallel to slope contours (Figure S1). In the



absence of a discernable slope, transects were aligned north-south. All sampling was conducted in July 2012 and 2013 except stand age, which was sampled in 2016.

### **2.3 Stand Age**

To determine stand age, we collected a wood slab or core from the base (~ 30 cm above the organic layer) of 5-10 trees sampled randomly within each stand. Wood samples were dried at 60 °C and then sanded sequentially with finer grit sizes to obtain a smooth surface. Each sample was then scanned and the annual growth rings were counted using WinDendro (Regent Instruments, Inc., Ontario).

### **2.4 Solar Insolation and Slope**

Slope and aspect at each site were determined from a 4-m-resolution digital elevation model of the watershed created by the Polar Geospatial Center (<http://www.pgc.umn.edu/>) using stereo-pairs of World ViewX imagery. Solar insolation was estimated using the Solar Radiation analyses toolset in ArcGIS version 10 (ESRI , Redlands, CA). The toolset used variability in the orientation (slope and aspect) to calculate direct and diffuse radiation for each pixel of the elevation model in the Y4 watershed using viewshed algorithms (Fu and Rich, 2002; Rich et al., 1994). We report total insolation on the summer solstice for each pixel.

### **2.5 Aboveground biomass**

We measured diameter at breast height (DBH; 1.4 m height) or basal diameter (BD; < 1.4 m height) of all trees and snags (i.e., dead trees standing  $\geq 45^\circ$  to the forest floor) within each 40

m<sup>2</sup> plot (n= 3/site). Live and dead aboveground tree biomass were determined based on allometric equations developed from *L. cajanderi* trees harvested near Cherskiy (Alexander et al., 2012). Tree biomass was converted to C mass using a C concentration of 46% C for foliage (live trees only), 47% C for stemwood/bark and snag, and 48% C for branches (Alexander et al., 2012).

We estimated understory percent cover in six 1 m<sup>2</sup> subplots at each site; subplots were placed at both ends of each of the three plots (at 0 and 20 m; Figure S1). Understory vegetation was sorted into functional types, which included shrub (evergreen and deciduous), herbs (forb and graminoids), moss, lichen, and other (woody debris and bare ground). In each site, understory vascular plant biomass was determined in three 0.25 m<sup>2</sup> quadrats, each of which was located within one of the percent cover plots. We measured basal diameter of tall deciduous shrubs (*Alnus* spp., *B. nana*, and *Salix* spp.) and used published allometric relationships to derive biomass (Berner et al., 2015). All remaining vascular plants were harvested and dried at 60 °C for 48 hours for dry mass determination. We converted live understory biomass values to C pools by multiplying biomass by 48% C content.

Following the line-intercept method for measuring woody debris (Brown, 1974), we set a 20-m transect along the middle of each plot, and counted the number of times woody debris intercepted the transect for Class I fine woody debris (FWD; 0.0-0.49 cm diameter), and Class II FWD (0.5-0.99 cm) along the first 2 m, Class III FWD (1.0 – 2.99cm) along the first 10 m, and classes IV FWD (3.0-4.99 cm), V FWD (5.0-6.99 cm), and downed coarse woody debris (CWD; > 7 cm diameter) along the entire 20 m length. We calculated the mass of woody debris according to Alexander et al. (2012) using previously published multipliers for softwood boreal trees from the Northwest Territories of Canada for FWD (Nalder et al., 1997) and decay class

and density values for softwood boreal tree species within Ontario, Canada for CWD (Ter-Mikaelian et al., 2008). Mass values were converted to C pools based on average C concentration of *L. cajanderi* boles (47% C). Total aboveground biomass (AGB) is reported as the sum of the C pools in woody debris, snags, trees, and understory biomass.

## **2.6 Canopy cover and leaf area index**

We measured canopy cover under uniform, diffuse light conditions at the center of each site in four cardinal directions using a convex spherical densitometer, and Leaf Area Index (LAI) using both hemispherical photography and an LAI-2000 Plant Canopy Analyzer (Li-COR, Nebraska, NE, USA). The LAI-2000 was placed ~1 m above the ground at the center of each site, and LAI estimates were divided by a factor of 0.68 (Chen et al., 2005) to account for foliage clumping (Chen et al., 1997). Hemispherical photographs were taken ~1 m off the ground using a Sigma SD 15 digital reflex camera with Sigma 4.5 mm F2.8 EX DC circular fisheye lens. A N-S reflector was used for N orientation and photographs were taken using automatic settings at the center of each of the three transects at each site. The hemispherical photographs were analyzed using Hemiview software.

## **2.7 Thaw depth/organic layer depth**

We measured thaw depth using a metal thaw probe every meter along a 20 m transect placed along the center of each plot (measured from 9 July through 3 August; does not represent maximum thaw). Organic layer depth (OLD) was measured at 5 m intervals along each transect by cutting through the active layer soil with a serrated knife and visually identifying and measuring the depth to the organic-mineral boundary.

## 2.8 Soil sampling and analysis

Active layer soils were collected from all sites. Surface permafrost soils (approximately the top 60 cm of frozen soil, which contained some frozen active layer soil) were sampled at seven sites (3 cores per site), and deep permafrost (15 m depth) was sampled at two sites (Sites 18 and 19). We collected six active layer samples from each site, one at each end of the 20-m-long plots. We used a serrated knife to collect an 8 cm x 8 cm sample from the organic layer, and a 2 cm diameter manual corer to collect the top 10 cm of mineral soil. When less than 5 cm of mineral soil was thawed at the time of sampling, the mineral soil sample was excluded from analysis (n=5). At the seven sites where surface permafrost was sampled, we collected mineral soil to frozen ground (average 28 cm thawed mineral soil depth) using a manual corer, and sampled approximately 60 cm depth of frozen soil with a Soil Ice and Permafrost Research Experiment (SIPRE) auger (7.62 cm diameter). We collected two deep permafrost cores with a rotary drill rig (UKB-12/25, Drilling Technology Factory); one deep core was collected from a site underlain by yedoma and the other from an alas. Carbon pools presented for deep permafrost include C in the active layer sampled at the drilling location. Carbon pools reported for 1 m depth were calculated using the seven surface permafrost samples as well as the top 1 m of the deep core from the yedoma site. All permafrost samples were kept frozen until analyzed as described below.

Surface permafrost cores were sectioned into 10 cm increments (Supplement Table 4). Coarse-roots (> 2 mm) were removed from all active layer and surface permafrost soils, and fine roots and organic soils were dried at 60 °C for 48 hours while mineral soils were dried at 105 °C for at least 48 hours. Gravimetric water content (GWC) was determined as the ratio of soil water

mass to soil dry mass, and was reported as a percentage (i.e.,  $\text{GWC} \times 100$ ). Organic matter content was measured as the percent mass lost from dried soil after combusting for 4 hours at 450°C. Soil C and nitrogen (N) content were analyzed on a subset of soils (35 of 111 organic soils; 119 of 271 active layer and surface permafrost mineral soil; and 30 of 149 deep permafrost samples) on a Costech CHN analyzer at St. Olaf College or at the University of Georgia Stable Isotope Ecology Lab. Carbon concentrations of the full set of soil samples were then modeled using a linear relationship between organic matter content and %C ( $\text{C}\% = 0.524 * \text{OM}\% - 0.575$ ;  $R^2=0.96$  for active layer and surface permafrost;  $\text{C}\% = 0.391 * \text{OM}\% - 0.103$ ;  $R^2=0.86$  for deep permafrost samples). Carbon content of coarse roots was assumed to be 50%. Sampled soils were reclassified as organic or mineral as needed ( $< 1\%$  of samples) based on soil carbon content ( $\text{C} \geq 20\%$  for organic soils).

Bulk density (BD) was determined as the mass of dry soil per unit volume ( $\text{g cm}^{-3}$ ). Volume of active layer soil samples was determined by measuring the ground area and depth from where the soil sample was removed. Volume of permafrost samples was quantified by water displacement. Ice volume was determined based on soil water content and assuming an ice density of  $0.9167 \text{ g cm}^{-3}$ .

Soil C stocks in each depth increment were calculated as the product of %C, BD and soil depth. For the deep permafrost samples, sub-samples used for %C, %OM, and BD measurements were collected from adjacent depth increments; therefore, for the %C-%OM regression and C pool calculations, we used adjacent depth increments or interpolated values between two adjacent depths.

## **2.9 Statistical analysis**

To compare the variance in soil C between sites and between studies, we used the coefficient of variation (CV), which is the ratio of the standard deviation to the mean. The CV is independent of the unit or magnitude and can be used to compare intra-site variation (how variable the data are relative to the mean value) among sites even if the mean of the sites is vastly different. We also used percent variation, which was calculated by subtracting the minimum value from the maximum value and dividing by the maximum value.

We used a linear model to determine the relationship between canopy cover and LAI and larch biomass and the relationship between the different components of AGB. To determine if BD varied with depth in the deep (>3 m) permafrost cores, we used the linear relationship between BD and depth. To determine if C density, BD, or ice content were significantly different between the two cores, we averaged the soil properties by 1 m increments and applied a paired t-test.

To determine potential environmental drivers of thaw depth and soil C, we fit a mixed effects linear model using the nlme package in R (Pinheiro et al., 2013), using average transect-level data as a replicate for each site. The fixed effects were the environmental variables, and the random effect was the nested study design (transects within sites). Both thaw depth and soil C were log-transformed to meet the assumption of normality. After collinear explanatory variables were removed from analysis using a variance inflation factor of three (as suggested by Zuur et al. (2009)), we considered densiometry, organic layer depth, stand age, live shrub biomass, woody debris, tree density, snag density, summer insolation, percent herbaceous cover, percent moss cover, percent lichen cover, percent other cover, soil C, BD, and root C, as explanatory variables for the thaw depth model. For the soil C model the environmental variables considered were: slope, summer insolation, snag biomass, live tree biomass, live shrub biomass, woody debris,

tree density, percent herbaceous cover, percent moss cover, percent lichen cover, percent other cover, thaw depth, organic layer depth, root carbon, and moisture. The best model for each analysis was selected using backwards stepwise reduction of variables to obtain the lowest *Akaike information criterion* (AIC) and the residuals of all final models were checked for normality and homogeneity of variance (Burnham and Anderson, 2002).

All reported errors are the standard error of the mean. All statistical analyses were conducted using the statistical program R (R Core Development Team, 2012).

### **3 RESULTS**

#### **3.1 Distribution of carbon pools**

The majority of C in the watershed to 1 m depth was stored belowground (92%;  $10.9 \pm 0.8$  kg C m<sup>-2</sup> in top 1 m; Figure 2), with 19% in the top 10 cm of soil and 40% in the top 30 cm. The top 10 cm of soil alone contained 58% more C than the total aboveground C stocks.

#### **3.2 Stand density, stand age, and aboveground biomass**

Stand density in the watershed ranged from 0.01 to 0.43 trees m<sup>-2</sup> in the forested sites (mean density was  $0.07 \pm 0.02$  trees m<sup>-2</sup>; Table 2). Mean stand age was 150 ( $\pm 17$ ) yrs (Table 1), but there was a large range in tree ages among sites (23-221 yrs) and within sites (average range: 78 yrs; maximum range: 238 yrs; minimum range: 7 yrs; Table S1).

Total C in AGB averaged  $959 \pm 150$  g C m<sup>-2</sup> across sites in the watershed, with 53% in larch biomass ( $460 \pm 77$  g C m<sup>-2</sup>), 30% in understory biomass ( $254 \pm 28$  g C m<sup>-2</sup>) 11% in woody debris ( $94 \pm 16.5$  g C m<sup>-2</sup>), and 6% in standing dead tree mass ( $55 \pm 19$  g C m<sup>-2</sup>) (Figure 2; Table 3). Among sites across the watershed, aboveground C varied up to 95%. Together, all C in AGB

contributed 8% to the total amount of C stored above and belowground (to 1 m) across the watershed. Mean stand age was positively related to mean stand AGB  $R^2=0.21$ ,  $p<0.001$  and negatively related to mean stand thaw depth ( $R^2=0.58$ ,  $p<0.001$ ).

Larch aboveground biomass was also highly variable across the watershed, with some sites as low as 0 or 1.7 g C m<sup>-2</sup> and others as high as 1,340 and 1,362 g C m<sup>-2</sup>. Of the three techniques used for estimating canopy cover, LAI values from hemispherical photography (Table 2) was mostly highly correlated with larch biomass ( $R^2=0.69$ ,  $p<0.001$ ), but larch biomass was also significantly associated with canopy density ( $R^2=0.5$ ,  $p<0.001$ ). There was no relationship between larch biomass and understory biomass ( $p>0.4$ ), however the percent cover of tall shrubs was negatively related to both moss ( $R^2=0.2$ ,  $p<0.001$ ) and lichen cover ( $R^2=0.2$ ,  $p<0.001$ ).

### 3.3 Surface soils

Average C content of the organic horizon was 37.6 ( $\pm 0.8$ ) %C, whereas C content of the thawed mineral horizon (0-10 cm) was 4.6 ( $\pm 0.48$ ) %C. There were 2.24 ( $\pm 1.22$ ) kg C m<sup>-2</sup> stored in the organic layer (average organic layer depth =  $11.2 \pm 0.2$  cm) and 1.96 ( $\pm 0.07$ ) kg C m<sup>-2</sup> in the top 10 cm of the mineral layer (Table 4).

There was large variation in BD, soil moisture (GWC), soil C content, and thaw depth among sites (Table 5). Carbon content and GWC were more variable in mineral soils than in organic ( $CV_{\text{mineral}} = 0.55$  for %C and 0.48 for GWC;  $CV_{\text{organic}} = 0.15$  for %C and 0.36 for GWC), while BD was more variable in organic soils ( $CV_{\text{organic}} = 0.51$ ;  $CV_{\text{mineral}} = 0.3$ ). While the CV of thaw depth was not particularly high (0.28), the difference between the sites with the highest and lowest thaw depth measured was still 65%, underscoring the heterogeneity of soil properties across the watershed. Variation in thaw depth was primarily due to stand age (Figure 3).



Soil C density in the top 10 cm of the ground surface (i.e., 0-10 cm soil depth, which may have contained both organic and mineral soils) varied up to 93% across the watershed (range: 0.51-7.14 kg C m<sup>-2</sup>; Table 4; Table S2), but the coefficient of variation (CV) was larger within sites (0.32) than it was between sites (0.26), indicating that soil C is more variable at the meter scale than it is at the kilometer scale. Environmental controls of soil C density in the top 10 cm were soil moisture, percent moss, and percent lichen cover (Table S3); soil C density was positively related to soil moisture and negatively related to percent moss and lichen cover (Figure 4).

Soil in the top 30 cm of the profile contained on average  $4.8 \pm 0.3$  kg C m<sup>-2</sup>, but soil C density in the top 30 cm varied by 56% across the watershed as a whole. The average CV within a site was 0.16 whereas the CV among sites was 0.22, indicating C density at 30 cm is similar or more variable across the watershed than at the meter scale. The top 1 m of soil contained  $10.9 \pm 0.8$  kg C m<sup>-2</sup> ( $13.8 \pm 3.0$  kg C m<sup>-2</sup> with alas site). Soil C in the top 1 m varied by 63% across the watershed and by 44% among sites. The average CV within a site was 0.15 whereas among sites the CV was 0.20, indicating soil C to 1 m is similarly variable at the meter and kilometer scales. Ice content in the top 1 m was on average  $68 \pm 2\%$  by volume, with a range of between 51% and 80%.

### **3.5 Deep permafrost soils**

Deep permafrost soils (includes surface active layer to 15 m) contained 205 kg C m<sup>-2</sup> (site 19; yedoma deposit, non-ice wedge) and 331 kg C m<sup>-2</sup> (site 18; alas). Carbon density at each 1 m interval ranged from 7.87-21.63 kg C m<sup>-2</sup> in the yedoma deposit and 6.9-14.5 kg C m<sup>-2</sup> in the deeper portion of the alas (Figure 5). The top 2 m of the alas were characterized by particularly high C density ( $\sim 100$  kg m<sup>-2</sup>).

Highlighting the variability of C in deep permafrost, the total soil C density in the two cores varied by 38% and was significantly different between the two cores ( $p < 0.001$ ). Ice content was not significantly different between the two cores over the full 15 m ( $p > 0.3$ ), but the alas site had significantly higher ice content than the yedoma site in the first 2 m (GWC:  $385 \pm 81\%$  and  $41 \pm 8\%$ , respectively;  $p = 0.002$ ). Throughout the entire profile, GWC was  $46 \pm 2\%$  in the yedoma core and  $100 \pm 23\%$  in the alas core. Overall, BD was not significantly different between the two cores ( $p > 0.5$ ) and most of the variation in BD occurred in the top 5 m (Figure 5).

## 4 DISCUSSION

### 4.1 Aboveground biomass

Aboveground C pools within the Y4 watershed represented only a small fraction (9%) of total C pools, likely due to low tree density at most sites ( $< 0.09$  trees  $\text{m}^{-2}$  in all but one site) and/or young stand age at a few sites. Low-density, mature ( $> 75$  years old) stands with no recent fire activity are common in this region (Berner et al. 2012); however, wildfires can produce stands of considerably higher density ( $> 3$  trees  $\text{m}^{-2}$ ), which can substantially increase AGB and contribution to total C pools as stands mature (Alexander et al. 2012). Aboveground C pools were similar to those reported by Alexander et al. (2012) for 17 nearby stands of similar age and density but were lower ( $\sim 33\%$ ) than the landscape-level estimates ( $\sim 600$  g C  $\text{m}^{-2}$ ) across the Kolyma River basin (Berner et al. 2012). Our estimates were also four times lower than that of a mature (155-yr old), mid-density ( $0.19$  trees  $\text{m}^{-2}$ ) stand near Cherskiy and two times lower than a mature, low-density ( $0.08$  trees  $\text{m}^{-2}$ ) stand near Oymyakon, south of Cherskiy (Kajimoto et al., 2006). In addition, our larch AGB estimates fell within the low range of larch stands across

other high-latitude ( $> 64^{\circ}$  N) regions and were generally 3-10 times lower than other stands (Kajimoto et al., 2010). Our considerably lower estimates reflect both the sparse, open grown structure of our stands (Osawa and Kajimoto, 2010) and the poor soil environment (e.g., shallow rooting zone, low soil temperature, low N availability) found in stands near latitudinal and altitudinal treeline (Kajimoto et al. 2010). Despite the small contribution of AGB to total C pools across our stands, aboveground vegetation composition and structure were important factors influencing soil C pools and permafrost thaw (see below). In addition, characteristics of aboveground vegetation are major determinants of land-atmosphere C fluxes (Bradshaw and Warkentin, 2015) and thus remain essential components of C dynamics even when pools are relatively low.

## **4.2 Variability of soil C pools**

Soil C density is controlled by numerous biogeophysical factors such as climate, local geomorphology, soil parent material, time since last disturbance, and vegetation type, all of which lead to high variability in soil C pools at the regional and local scale. Our soil C pool estimates for a Siberian larch forest watershed fall within the range of published assessments that characterize this area (Alexander et al. 2012; Broderick et al. 2015), but are at the low end of other studies (Alexeyev and Birdsey, 1998; Hugelius et al., 2014; Matsuura et al., 2005; Palmtag et al., 2015; Stolbovoi, 2006). For example, our mean estimate of  $4.8 \pm 1 \text{ kg C m}^{-2}$  in the top 30 cm of soil is less than half of a published assessment of C stored in soils across Russian larch forests ( $10.2 \text{ kg C m}^{-2}$ ; Stolbovoi, 2006), and less than one third of the mean estimate for Turbel soils across the permafrost region ( $14.7 \text{ kg C m}^{-2}$ ; Hugelius et al., 2014); however, variation in the permafrost region Turbel soil C pool is high ( $\text{CV} = 0.85$ ; Hugelius et al., 2014), and our mean estimate falls within one standard deviation of this regional mean.

Within larch forests, there is substantial variation in soil C pools at regional scales, driven by variation in soil parent material and climate. For example, larch forests in Northeastern Siberia store significantly more C ( $16 \text{ kg C m}^{-2}$ ) in the active layer and have more variable soil C pool estimates than larch forests in Central Siberia ( $6.3 \text{ kg C m}^{-2}$ ) (Matsuura and Hirobe, 2010). There is also considerable variation in soil C pools within larch forests at smaller spatial scales. Indeed, the active layer in larch forests located within 50 km from our study site contained twice as much C as found in our study ( $4.8 \pm 0.3 \text{ kg C m}^{-2}$  to 30 cm); there was  $8.3 \text{ kg C m}^{-2}$  in the active layer (38 cm) of a larch forest 44 km from the Y4 watershed (Matsuura et al., 2005) and  $9.5 \pm 2.9$  (SD)  $\text{kg C m}^{-2}$  in the top 30 cm of soils from a forest 3 km away (Palmtag et al., 2015). This variation in soil C pools points to the extreme variability in soil C throughout the landscape, even at the kilometer scale. It also highlights the importance of sampling replication at small scales; with 21 total soil cores at seven sites, our CV (0.13) was less than half of other studies with lower site-level replication (Palmtag et al., 2015).

As the climate warms, C in surface permafrost is becoming increasingly vulnerable to thawing and subsequent decomposition and loss to the atmosphere. As such, estimating variation in carbon pool size is critical for understanding permafrost climate feedbacks. The C stored in the top 1 m of Y4 soils ( $10.9 \pm 0.8 \text{ kg C m}^{-2}$ ) was similar to the average 1 m C pool reported for the Yakutia region, which comprises a range of ecosystem types ( $8.1 \text{ kg C m}^{-2}$ ; Alexeyev and Birdsey, 1998) but 37% lower than the 1 m soil C pool reported in a forest only 3 km away ( $17.3 \pm 5.7 \text{ kg C m}^{-2}$ ; Palmtag et al., 2015). However, the percent difference between our estimate and the nearby study (37%) was similar to the percent difference found between sites in the Y4 watershed (44%; Table 4), suggesting that these differences among studies are likely due to natural variation in the landscape.

Carbon pool estimates from deep permafrost (>3 m) are limited across the Arctic (Hugelius et al., 2014; Schuur et al., 2015; Tarnocai et al., 2009), yet these data are critical for assessing variation in and controls on C density of yedoma, as these soils have particularly high C density at depth (Strauss et al., 2013; Zimov et al., 2006). The average carbon density of deep permafrost from yedoma deposits in the Y4 watershed ( $13.5 \text{ kg C m}^{-3}$ ) was similar to values reported for yedoma in pan-Arctic summary studies ( $10 \pm 7/-6 \text{ kg C m}^{-3}$ , Strauss et al. (2013);  $13.0 \pm 0.75 \text{ kg C m}^{-3}$ , after correction for ice volume, Walter Anthony et al. (2014)) and in taiga sites within 100 km of Cherskiy ( $12.3\text{-}15.4 \text{ kg C m}^{-3}$  after correction for ice volume, Walter Anthony et al. (2014) and references therein;  $14.3 \text{ kg C m}^{-3}$ , Shmelev et al., 2017). Carbon density was almost twice as high in the alas, which is consistent with findings indicating that alas and thermokarst soils store substantially more C ( $\sim 40\text{-}70\%$ ; Walter Anthony et al. (2014); Strauss et al. (2013); Siewert et al. (2010)) than undisturbed yedoma, a difference that is likely due to higher rates of recent (Holocene) C accumulation at the alas site (Walter Anthony et al., 2014). Yedoma is characterized by high landscape-level ice content due to the prevalence of large ice wedges, which can comprise 31 to 63% of ground volume (Ulrich et al., 2014). Accounting for these deep ice deposits, which were not sampled in this study, would reduce our landscape-level estimate of C content in the top 15 m of yedoma from  $205 \text{ kg C m}^{-2}$  to  $76\text{-}141 \text{ kg C m}^{-2}$ , which is still an order of magnitude more C than is stored in the active layer and two orders of magnitude more C than is stored in biomass.

### **4.3 Micro-scale environmental controls of soil carbon and thaw depth**

In addition to the effects of parent material and climate on soil C storage, soil carbon pools are determined by the balance between biological inputs and losses due to microbial decomposition and lateral transport. These biological processes are, in turn, also heavily

influenced by climate on regional and local scales. Here we find that soil samples with higher moisture content also had higher C density, suggesting that soil C was controlled by soil moisture. This is likely a result of lower rates of decomposition; in wetter soils, oxygen diffusion is slow, resulting in anaerobic conditions where microbial decomposition is slower, and C can accumulate at a higher rate than in more well-drained, well-aerated soils (Schädel et al., 2016). However, it is likely that this positive association between moisture and C density may also be a result of increased C inputs and plant productivity associated with higher soil moisture (Berner et al. 2013) or the lateral movement of dissolved organic C into the wetter sites.

Species composition also plays an important role in soil C storage in boreal forests (Hollingsworth et al., 2008) through the quality and quantity of litter inputs and their effects on environmental controls such as soil moisture and temperature. Lichens and mosses are sometimes thought to encourage soil C storage through their promotion of low soil temperatures, higher moisture, and a relatively acidic environment (Bonan and Shugar, 1989). However, at our sites, increasing abundance of lichen and moss was associated with lower soil C storage, which may have been due to lower rates of C fixation (Turetsky et al., 2010), higher rates of decomposition of vascular plant litter in moss and lichen patches (Wardle et al., 2003), or impacts of moss and lichen on soil moisture and soil temperatures.

Increasing thaw depth may result in increased C loss from boreal ecosystems; as more soil is thawed, more organic matter is available for decomposition. We found that thaw depth was negatively related to stand age, which is likely because forest fires tend to increase thaw depth (O'Donnell et al., 2011; Yoshikawa et al., 2002) and the deeper thaw depth observed in the younger sites could be a result of more recent burning events.

## 5 CONCLUSIONS

We found that the overwhelming majority of C in the Y4 watershed was stored belowground but that the amount of C within any given pool was highly variable throughout the landscape; C storage in AGB varied up to 95% among sites and there was 69% variation in the top 10 cm of soil, 36% in the top 30 cm, and 28% in the top 1 m. This variability among sites in our study was similar to the variability between our sites and others that were 3 to 50 km away (Matsuura et al., 2005; Palmtag et al., 2015), indicating a high level of natural variability at the meter and kilometer scales. Our results also indicate higher soil C variability in surface soils when compared to deeper soils, indicating that recent, on-going processes significantly contribute to soil C variability. Specifically, our results suggest that aboveground processes such as the regulation of soil moisture by aboveground vegetation, vegetation community structure and litter inputs are influential in controlling near-surface belowground C storage. These linkages between above and belowground processes, such as the negative relationship between stand age and thaw depth, have important implications for soil C vulnerability as tree lines shift and biomass and stand structure are increasingly impacted by fire, climate, and direct human disturbances.

## DATA AVAILABILITY

All data are available through the Arctic Data Center through the following citation:  
Kathryn Heard, Susan Natali, Andrew Bunn, and Heather D. Alexander. 2015. Northeast Siberia Plant and Soil Data: Plant Composition and Cover, Plant and Soil Carbon Pools, and Thaw Depth. NSF Arctic Data Center. doi:10.5065/D6NG4NP0.

## **AUTHOR CONTRIBUTION**

E. Webb contributed to data collection and processing and analyzed data, created figures, and drafted manuscript. K. Heard collected, processed, and summarized data and contributed to writing. S. Natali oversaw and contributed to data collection, processing, analysis, and writing. A. Bunn oversaw data collection, processing, and analysis. H. Alexander contributed to data collection, analysis, and writing. L. Berner contributed to data collection and processing and figure creation. M. Loranty contributed to data collection and processing. J. Schade contributed to lab analyses. V. Spektor and A. Kholodov collected and processed deep permafrost cores. N. Zimov contributed to data collection. All authors reviewed the manuscript and provided critical feedback.

## **COMPETING INTERESTS**

The authors declare that they have no conflict of interest.

## **ACKNOWLEDGMENTS**

This project was supported by funding from the National Geographic Society (Natali) and the National Science Foundation (NSF-1044610, NSF-1417745 NSF-1014180, NSF-1044417, NSF-1417700, NSF-1417908; Natali, Natali, Schade, Bunn, Loranty, Kholodov). We thank S. Shin and other Polaris 2013 participants for field and lab assistance, and the staff and scientists at the Northeast Science Station for logistical and field support.

## **REFERENCES**

Alexander, H. D., Mack, M. C., Goetz, S., Loranty, M. M., Beck, P. S. A., Earl, K., Zimov, S., Davydov, S. and Thompson, C. C.: Carbon Accumulation Patterns During Post-Fire



- Succession in Cajander Larch (*Larix cajanderi*) Forests of Siberia, *Ecosystems*, 15(7), 1065–1082, doi:10.1007/s10021-012-9567-6, 2012.
- Alexeyev, V. A. and Birdsey, R. A.: Carbon Storage in Forests and Peatlands of Russia, Radnor, PA., 1998.
- Beck, P. S. A., Juday, G. P., Alix, C., Barber, V. A., Winslow, S. E., Sousa, E. E., Heiser, P., Herriges, J. D. and Goetz, S. J.: Changes in forest productivity across Alaska consistent with biome shift, *Ecol. Lett.*, 14, 373–379, doi:10.1111/j.1461-0248.2011.01598.x, 2011.
- Beer, C.: Permafrost Sub-grid Heterogeneity of Soil Properties Key for 3-D Soil Processes and Future Climate Projections, *Front. Earth Sci.*, 4(August), 1–7, doi:10.3389/feart.2016.00081, 2016.
- Berg, E. E., Henry, J. D., Fastie, C. L., Volder, A. D. De and Matsuoka, S. M.: Spruce beetle outbreaks on the Kenai Peninsula, Alaska, and Kluane National Park and Reserve, Yukon Territory: Relationship to summer temperatures and regional differences in disturbance regimes, *For. Ecol. Manage.*, 227, 219–232, doi:10.1016/j.foreco.2006.02.038, 2006.
- Berner, L. T., Beck, P. S. A., Loranty, M. M., Alexander, H. D., MacK, M. C. and Goetz, S. J.: Cajander larch (*Larix cajanderi*) biomass distribution, fire regime and post-fire recovery in northeastern Siberia, *Biogeosciences*, 9(10), 3943–3959, doi:10.5194/bg-9-3943-2012, 2012.
- Berner, L. T., Beck, P. S. A., Bunn, A. G. and Goetz, S. J.: Plant response to climate change along the forest-tundra ecotone in northeastern Siberia, *Glob. Chang. Biol.*, 19(11), 3449–3462, doi:10.1111/gcb.12304, 2013.
- Berner, L. T., Alexander, H. D., Loranty, M. M., Ganzlin, P., Mack, M. C., Davydov, S. P. and Goetz, S. J.: Biomass allometry for alder, dwarf birch, and willow in boreal forest and tundra ecosystems of far northeastern Siberia and north-central Alaska, *For. Ecol. Manage.*, 337, 110–118, doi:10.1016/j.foreco.2014.10.027, 2015.
- Bonan, G. B. and Shugar, H. H.: Environmental Factors and Ecological Processes in Boreal Forests, *Annu. Rev. Ecol. Syst.*, 20, 1–28, 1989.
- Bradshaw, C. and Warkentin, I. G.: Global estimates of boreal forest carbon stocks and flux, *Glob. Planet. Change*, 128(February), 24–30, doi:10.1016/j.gloplacha.2015.02.004, 2015.
- Brown, J. K.: Handbook for Inventorying Downed Woody Material, Ogden, Utah., 1974.
- Burnham, K. P. and Anderson, D. R.: Model Selection and Multimodel Inference: A Practical Information-Theoretic Approach, 2nd ed., Springer, New York., 2002.
- Carvalhais, N., Forkel, M., Khomik, M., Bellarby, J., Jung, M., Migliavacca, M., Mu, M., Saatchi, S., Santoro, M., Thurner, M., Weber, U., Ahrens, B., Beer, C., Cescatti, A., Randerson, J. T., Reichstein, M., Mu, M., Saatchi, S., Santoro, M., Thurner, M., Weber, U., Ahrens, B., Beer, C., Cescatti, A., Randerson, J. T., Reichstein, M., Mu, M., Saatchi, S., Santoro, M., Thurner, M., Weber, U., Ahrens, B., Beer, C., Cescatti, A., Randerson, J. T. and Reichstein, M.: Global covariation of carbon turnover times with climate in terrestrial ecosystems, *Nature*, 514(7521), 213–217, doi:10.1038/nature13731, 2014.
- Chapin, F. S., McGuire, A. D., Randerson, J., Pielske, R., Baldocchi, D., Hobbie, S. E., Roulet, N., Eugster, W., Kasischke, E. S., Rastetter, E. B., Zimov, S. A. and Running, S. W.: Arctic and boreal ecosystems of western North America as components of the climate system, *Glob. Chang. Biol.*, 6, 211–223, 2000.
- Chapin, F. S., Euskirchen, E. S., Tape, K. D., Thompson, C. D. C., Walker, D. A., McGuire, A. D., Rupp, T. S., Hinzman, L. D., Sturm, M., Serreze, M. C., McFadden, J. P., Key, J. R.,

- Lloyd, A. H., Lynch, A. H., Beringer, J., Schimel, J. P., Chapman, W. L., Epstein, H. E., Jia, G., Ping, C.-L. L., Welker, J. M., McGuire, A. D., Rupp, T. S., Lynch, A. H., Schimel, J. P., Beringer, J., Chapman, W. L., Epstein, H. E., Euskirchen, E. S., Hinzman, L. D., Jia, G., Ping, C.-L. L., Tape, K. D., Thompson, C. D. C., Walker, D. A. and Welker, J. M.: Role of land-surface changes in arctic summer warming, *Science* (80-. ), 310(5748), 657, doi:10.1126/science.1117368, 2005.
- Chen, J. M., Rich, P. M., Gower, S. T., Norman, J. M. and Plummer, S.: Leaf area index of boreal forests: Theory, techniques, and measurements, *J. Geophys. Res.*, 102(D24), 429–443, doi:10.1029/97JD01107, 1997.
- Chen, J. M., Menges, C. H. and Leblanc, S. G.: Global mapping of foliage clumping index using multi-angular satellite data, *Remote Sens. Environ.*, 97(4), 447–457, doi:10.1016/j.rse.2005.05.003, 2005.
- Christensen, J. H., Kumar, K. K., Aldrian, E., An, S.-I., Cavalcanti, I. F. A., Castro, M. de, Dong, W., Goswami, P., Hall, A., Kanyanga, J. K., Kitoh, A., Kossin, J., Lau, N.-C., Renwick, J., Stephenson, D. B., Xie, S.-P. and Zhou, T.: Climate Phenomena and their Relevance for Future Regional Climate Change., in *Climate Change 2013: The Physical Science Basis. Contribution of Working Group 1 to the fifth Assessment Report of the Intergovernmental Panel on Climate Change*, edited by T. . Stocker, D. Qin, G.-K. Plattner, M. Tignor, S. K. Allen, J. Boschung, A. Nauels, Y. Xia, V. Bex, and P. M. Midgley, Cambridge University Press, Cambridge, United Kingdom and New York, NY, USA., 2013.
- Elmendorf, S. C., Henry, G. H. R., Hollister, R. D., Björk, R. G., Boulanger-Lapointe, N., Cooper, E. J., Cornelissen, J. H. C., Day, T. A., Dorrepaal, E., Elumeeva, T. G., Gill, M., Gould, W. A., Harte, J., Hik, D. S., Hofgaard, A., Johnson, D. R., Johnstone, J. F., Jónsdóttir, I. S., Jorgenson, J. C., Klanderud, K., Klein, J. A., Koh, S., Kudo, G., Lara, M., Lévesque, E., Magnússon, B., May, J. L., Mercado-Dí'az, J. A., Michelsen, A., Molau, U., Myers-Smith, I. H., Oberbauer, S. F., Onipchenko, V. G., Rixen, C., Schmidt, N. M., Shaver, G. R., Spasojevic, M. J., Þórhallsdóttir, Þ. E., Tolvanen, A., Troxler, T., Tweedie, C. E., Villareal, S., Wahren, C.-H., Walker, X., Webber, P. J., Welker, J. M. and Wipf, S.: Plot-scale evidence of tundra vegetation change and links to recent summer warming, *Nat. Clim. Chang.*, 2(6), 453–457, doi:10.1038/nclimate1465, 2012.
- Euskirchen, E. S., McGuire, a D., Chapin, F. S., Yi, S., Thompson, C. C. and Thompson3, C. C.: Changes in Vegetation in Northern Alaska under Scenarios of Climate Change, 2003–2100: Implications for Climate Feedbacks Changes in vegetation in northern Alaska under scenarios of climate change, 2003-2100: implications for climate feedbacks, *Ecol. Appl.*, 19(194), 1022–1043, doi:10.1890/08-0806.1, 2009.
- Fisher, J. P., Estop-Aragones, C., Thierry, A., Charman, D. J., Wolfe, S. A., Hartley, I. P., Murton, J. B., Williams, M. and Phoenix, G. K.: The influence of vegetation and soil characteristics on active-layer thickness of permafrost soils in boreal forest, *Glob. Chang. Biol.*, 22(9), 3127–3140, doi:10.1111/gcb.13248, 2016.
- Fu, P. and Rich, P.: A geometric solar radiation model with applications in agriculture and forestry, *Comput. Electron. Agric.*, 37(1–3), 25–35, doi:10.1016/S0168-1699(02)00115-1, 2002.
- Goetz, S. J., Mack, M. C., Gurney, K. R., Randerson, J. T. and Houghton, R. A.: Ecosystem responses to recent climate change and fire disturbance at northern high latitudes: observations and model results contrasting northern Eurasia and North America, *Environ.*

- Res. Lett., 2(4), 45031, doi:10.1088/1748-9326/2/4/045031, 2007.
- Grosse, G., Robinson, J., Bryant, R., Taylor, M. D., Harper, W., DeMasi, A., Kyker-Snowman, E. Veremeeva, A., Schirrmeister, L. and Harden, J.: Distribution of late Pleistocene ice-rich syngenetic permafrost of the Yedoma Suite in east and central Siberia, Russia, *Geol. Surv. Open File Rep.* 2013-1078, 37pp [online] Available from: <http://epic.awi.de/33878/>, 2013.
- Guay, K. C., Beck, P. S. A., Berner, L. T., Goetz, S. J., Baccini, A. and Buermann, W.: Vegetation productivity patterns at high northern latitudes: A multi-sensor satellite data assessment, *Glob. Chang. Biol.*, 20(10), 3147–3158, doi:10.1111/gcb.12647, 2014.
- Harden, J. W., Koven, C. D., Ping, C.-L., Hugelius, G., David McGuire, a., Camill, P., Jorgenson, T., Kuhry, P., Michaelson, G. J., O'Donnell, J. a., Schuur, E. a. G., Tarnocai, C., Johnson, K. and Grosse, G.: Field information links permafrost carbon to physical vulnerabilities of thawing, *Geophys. Res. Lett.*, 39(15), 1–6, doi:10.1029/2012GL051958, 2012.
- Hobbie, S. E., Schimel, J. P., Trumbore, S. E. and Randerson, J. R.: Controls over carbon storage and turnover in high-latitude soils, *Glob. Chang. Biol.*, 6(S1), 196–210, doi:10.1046/j.1365-2486.2000.06021.x, 2000.
- Hollingsworth, T. N., Schuur, E. A. G., Chapin, F. S. and Walker, M. D.: Plant community composition as a predictor of regional soil carbon storage in Alaskan boreal black spruce ecosystems, *Ecosystems*, 11(4), 629–642, doi:10.1007/s10021-008-9147-y, 2008.
- Holmes, R. M., McClelland, J. W., Peterson, B. J., Tank, S. E., Bulygina, E., Eglinton, T. I., Gordeev, V. V., Gurtovaya, T. Y., Raymond, P. A., Repeta, D. J., Staples, R., Striegl, R. G., Zhulidov, A. V. and Zimov, S. A.: Seasonal and Annual Fluxes of Nutrients and Organic Matter from Large Rivers to the Arctic Ocean and Surrounding Seas, *Estuaries and Coasts*, 35(2), 369–382, doi:10.1007/s12237-011-9386-6, 2012.
- Hugelius, G., Strauss, J., Zubrzycki, S., Harden, J. W., Schuur, E. A. G., Ping, C. L., Schirrmeister, L., Grosse, G., Michaelson, G. J., Koven, C. D., O'Donnell, J. A., Elberling, B., Mishra, U., Camill, P., Yu, Z., Palmtag, J. and Kuhry, P.: Estimated stocks of circumpolar permafrost carbon with quantified uncertainty ranges and identified data gaps, *Biogeosciences*, 11(23), 6573–6593, doi:10.5194/bg-11-6573-2014, 2014.
- Jean, M. and Payette, S.: Effect of vegetation cover on the ground thermal regime of wooded and non-wooded palsas, *Permafr. Periglac. Process.*, 25(4), 281–294, doi:10.1002/ppp.1817, 2014.
- Johnson, K. D., Harden, J., McGuire, A. D., Bliss, N. B., Bockheim, J. G., Clark, M., Nettleton-Hollingsworth, T., Jorgenson, M. T., Kane, E. S., Mack, M., O'Donnell, J., Ping, C. L., Schuur, E. A. G., Turetsky, M. R. and Valentine, D. W.: Soil carbon distribution in Alaska in relation to soil-forming factors, *Geoderma*, 167–168, 71–84, doi:10.1016/j.geoderma.2011.10.006, 2011.
- Kajimoto, T., Matsuura, Y., Osawa, A., Abaimov, A. P., Zyryanova, O. A., Isaev, A. P. and Yefremov, D. P.: Size – mass allometry and biomass allocation of two larch species growing on the continuous permafrost region in Siberia, *For. Ecol. Manage.*, 222, 314–325, doi:10.1016/j.foreco.2005.10.031, 2006.
- Kajimoto, T., Osawa, A., Usoltsev, V. A. and Abaimov, A. P.: Biomass and Productivity of Siberian Larch Forest Ecosystems, in *Permafrost Ecosystems: Siberian Larch Forests*, vol. 209, edited by A. Osawa, O. Zyryanova, Y. Matsuura, T. Kajimoto, and R. Wein, pp. 99–120, Springer., 2010.

- Kasischke, E. S. and Turetsky, M. R.: Recent changes in the fire regime across the North American boreal region - Spatial and temporal patterns of burning across Canada and Alaska, *Geophys. Res. Lett.*, 33(9), 1–5, doi:10.1029/2006GL025677, 2006.
- Koven, C. D., Schuur, E. A. G., Schädel, C., Bohn, T. J., Burke, E. J., Chen, G., Chen, X., Ciais, P., Grosse, G., Harden, J. W., Hayes, D. J., Hugelius, G., Jafarov, E. E., Krinner, G., Kuhry, P., Lawrence, D. M., MacDougall, A. H., Marchenko, S. S., McGuire, A. D., Natali, S. M., Nicolsky, D. J., Olefeldt, D., Peng, S., Romanovsky, V. E., Schaefer, K. M., Strauss, J., Treat, C. C. and Turetsky, M.: A simplified, data-constrained approach to estimate the permafrost carbon–climate feedback, *Philos. Trans. R. Soc. A Math. Phys. Eng. Sci.*, 373(2054), 20140423, doi:10.1098/rsta.2014.0423, 2015.
- Kurz, W. A., Dymond, C. C., Stinson, G., Rampley, G. J., Neilson, E. T., Carroll, A. L., Ebata, T. and Safranyik, L.: Mountain pine beetle and forest carbon feedback to climate change., *Nature*, 452(7190), 987–90, doi:10.1038/nature06777, 2008.
- Liljedahl, A. K., Boike, J., Daanen, R. P., Fedorov, A. N., Frost, G. V., Grosse, G., Hinzman, L. D., Iijima, Y., Jorgenson, J. C., Matveyeva, N., Necsoiu, M., Raynolds, M. K., Romanovsky, V. E., Schulla, J., Tape, K. D., Walker, D. A., Wilson, C., Yabuki, H. and Zona, D.: Pan-Arctic ice-wedge degradation in warming permafrost and influence on tundra hydrology, *Nat. Geosci.*, 9(April), 312–318, doi:10.1038/ngeo2674, 2016.
- Lloyd, A. H.: Ecological Histories from Alaskan Tree Lines Provide Insight into Future Change. Author(s): Andrea H . Lloyd Published by : Wiley Stable URL : <http://www.jstor.org/stable/3450611> Linked references are available on JSTOR for this article : You, *Ecology*, 86(7), 1687–1695, 2005.
- Loranty, M. M., Berner, L. T., Goetz, S. J., Jin, Y. and Randerson, J. T.: Vegetation controls on northern high latitude snow-albedo feedback: Observations and CMIP5 model simulations, *Glob. Chang. Biol.*, 20(2), 594–606, doi:10.1111/gcb.12391, 2014.
- Loranty, M. M., Lieberman-Cribbin, W., Berner, L. T., Natali, S. M., Goetz, S. J., Alexander, H. D. and Kholodov, A. L.: Spatial variation in vegetation productivity trends, fire disturbance, and soil carbon across arctic-boreal permafrost ecosystems, *Environ. Res. Lett.*, 11(9), 95008, doi:10.1088/1748-9326/11/9/095008, 2016.
- Mack, M. C., Schuur, E. a G., Bret-Harte, M. S., Shaver, G. R. and Chapin, F. S.: Ecosystem carbon storage in arctic tundra reduced by long-term nutrient fertilization., *Nature*, 431(7007), 440–3, doi:10.1038/nature02887, 2004.
- Matsuura, Y. and Hirobe, M.: Soil Carbon and Nitrogen , and Characteristics of Soil Active Layer in Siberian Permafrost Region, in *Permafrost Ecosystems: Siberian Larch Forests*, vol. 209, edited by A. Osawa, O. Zyryanova, Y. Matsuura, T. Kajimoto, and R. Wein, pp. 149–163, Springer., 2010.
- Matsuura, Y., Kajimoto, T., Osawa, A. and Abaimov, A. P.: Carbon storage in larch ecosystems in continuous permafrost region of Siberia, *Phyt. - Ann. Rei Bot.*, 45(4), 51–54, 2005.
- Mishra, U. and Riley, W. J.: Alaskan soil carbon stocks: Spatial variability and dependence on environmental factors, *Biogeosciences*, 9(9), 3637–3645, doi:10.5194/bg-9-3637-2012, 2012.
- Mishra, U., Jastrow, J. D., Matamala, R., Hugelius, G., Koven, C. D., Harden, J. W., Ping, C. L., Michaelson, G. J., Fan, Z., Miller, R. M., McGuire, a D., Tarnocai, C., Kuhry, P., Riley, W. J., Schaefer, K., Schuur, E. a G., Jorgenson, M. T. and Hinzman, L. D.: Empirical estimates to reduce modeling uncertainties of soil organic carbon in permafrost regions: a review of recent progress and remaining challenges, *Environ. Res. Lett.*, 8(3), 35020,

- doi:10.1088/1748-9326/8/3/035020, 2013.
- Myers-Smith, I. H., Elmendorf, S. C., Beck, P. S. a, Wilmking, M., Hallinger, M., Blok, D., Tape, K. D., Rayback, S. a, Macias-Fauria, M., Forbes, B. C., Speed, J. D. M., Boulanger-Lapointe, N., Rixen, C., Levesque, E., Schmidt, N. M., Baittinger, C., Trant, A. J., Hermanutz, L., Collier, L. S., Dawes, M. a, Lantz, T. C., Weijers, S., Jorgensen, R. H., Buchwal, A., Buras, A., Naito, A. T., Ravolainen, V., Schaepman-Strub, G., Wheeler, J. a, Wipf, S., Guay, K. C., Hik, D. S. and Vellend, M.: Climate sensitivity of shrub growth across the tundra biome, *Nat. Clim. Chang.*, advance on(September), 1–44, doi:10.1038/nclimate2697, 2015.
- Nalder, I. a, Wein, R. W., Alexander, M. E. and de Groot, W. J.: Physical properties of dead and downed round-wood fuels in the boreal forests of Alberta and Northwest Territories, *Int. J. Wildl. Fire*, 27(9), 1513–1517, doi:10.1139/x97-083, 1997.
- O'Donnell, J. A., Harden, J. W., Mcguire, A. D., Kanevskiy, M. Z., Jorgenson, M. T. and Xu, X.: The effect of fire and permafrost interactions on soil carbon accumulation in an upland black spruce ecosystem of interior Alaska: Implications for post-thaw carbon loss, *Glob. Chang. Biol.*, 17(3), 1461–1474, doi:10.1111/j.1365-2486.2010.02358.x, 2011.
- Osawa, A. and Kajimoto, T.: Development of Stand Structure in Larch Forests, in *Permafrost Ecosystems: Siberian Larch Forests*, vol. 209, edited by A. Osawa, O. Zyryanova, Y. Matsuura, T. Kajimoto, and R. Wein, pp. 123–148, Springer., 2010.
- Palmtag, J., Hugelius, G., Lashchinskiy, N., Tamstorf, M. P., Richter, A., Elberling, B. and Kuhry, P.: Storage, landscape distribution, and burial history of soil organic matter in contrasting areas of continuous permafrost, *Arctic, Antarct. Alp. Res.*, 47(1), 71–88, doi:10.1657/aaar0014-027, 2015.
- Pan, Y., Birdsey, R. a, Fang, J., Houghton, R., Kauppi, P. E., Kurz, W. a, Phillips, O. L., Shvidenko, A., Lewis, S. L., Canadell, J. G., Ciais, P., Jackson, R. B., Pacala, S. W., McGuire, a D., Piao, S., Rautiainen, A., Sitch, S. and Hayes, D.: A large and persistent carbon sink in the world's forests., *Science*, 333(6045), 988–93, doi:10.1126/science.1201609, 2011.
- Pearson, R. G., Phillips, S. J., Loranty, M. M., Beck, P. S. A., Damoulas, T., Knight, S. J. and Goetz, S. J.: Shifts in Arctic vegetation and associated feedbacks under climate change, *Nat. Clim. Chang.*, 3(7), 673–677, doi:10.1038/nclimate1858, 2013.
- Pinherio, J., Bates, D., Saikat, D. and Sarkar, D.: nlme: Linear and nonlinear mixed effects models. R package, R-core, 2013.
- R Core Development Team: R: A language and environment for statistical computing., [online] Available from: <http://www.r-project.org/>, 2012.
- Rich, P. M., Dubayah, R., Hetrick, W. A., Saving, S. C. and Dubayah, R. O.: Using Viewshed Models to Calculate Intercepted Solar Radiation: Applications in Ecology, *Am. Soc. Photogramm. Remote Sens. Tech. Pap.*, 524–529, 1994.
- Rogers, B. M., Soja, A. J., Goulden, M. L. and Randerson, J. T.: Influence of tree species on continental differences in boreal fires and climate feedbacks, *Nat. Geosci.*, 8(February), 228–234, doi:10.1016/j.cognition.2008.05.007, 2015.
- Salmon, V. G., Soucy, P., Mauritz, M., Celis, G., Natali, S. M., Mack, M. C. and Schuur, E. A. G.: Nitrogen availability increases in a tundra ecosystem during five years of experimental permafrost thaw, *Glob. Chang. Biol.*, 22(5), 1927–1941, doi:10.1111/gcb.13204, 2016.
- Schädel, C., Schuur, E. A. G., Bracho, R., Elberling, B., Knoblauch, C., Lee, H., Luo, Y.,

- Shaver, G. R. and Turetsky, M. R.: Circumpolar assessment of permafrost C quality and its vulnerability over time using long-term incubation data., *Glob. Chang. Biol.*, 20(2), 641–52, doi:10.1111/gcb.12417, 2014.
- Schädel, C., Bader, M. K.-F., Schuur, E. A. G., Biasi, C., Bracho, R., Čapek, P., De Baets, S., Diáková, K., Ernakovich, J., Estop-Aragones, C., Graham, D. E., Hartley, I. P., Iversen, C. M., Kane, E., Knoblauch, C., Lupascu, M., Martikainen, P. J., Natali, S. M., Norby, R. J., O'Donnell, J. A., Chowdhury, T. R., Šantrůčková, H., Shaver, G., Sloan, V. L., Treat, C. C., Turetsky, M. R., Waldrop, M. P. and Wickland, K. P.: Potential carbon emissions dominated by carbon dioxide from thawed permafrost soils, *Nat. Clim. Chang.*, 6(June), 1–5, doi:10.1038/nclimate3054, 2016.
- Schirrmeister, L., Grosse, G., Wetterich, S., Overduin, P. P., Strauss, J., Schuur, E. A. G. and Hubberten, H. W.: Fossil organic matter characteristics in permafrost deposits of the northeast Siberian Arctic, *J. Geophys. Res. Biogeosciences*, 116(3), doi:10.1029/2011JG001647, 2011.
- Schneider Von Deimling, T., Grosse, G., Strauss, J., Schirrmeister, L., Morgenstern, A., Schaphoff, S., Meinshausen, M. and Boike, J.: Observation-based modelling of permafrost carbon fluxes with accounting for deep carbon deposits and thermokarst activity, *Biogeosciences*, 12(11), 3469–3488, doi:10.5194/bg-12-3469-2015, 2015.
- Schuur, E. A. G., McGuire, A. D., Grosse, G., Harden, J. W., Hayes, D. J., Hugelius, G., Koven, C. D. and Kuhry, P.: Climate change and the permafrost carbon feedback, *Nature*, 520(January 2016), 171–179, doi:10.1038/nature14338, 2015.
- Shmelev, D., Veremeeva, A., Kraev, G., Kholodov, A., Spencer, R. G. M. and Walker, W. S.: Estimation and Sensitivity of Carbon Storage in Permafrost of North-Eastern Yakutia, *Permafr. Periglac. Process.*, (August 2016), doi:10.1002/ppp.1933, 2017.
- Shuman, J. K., Shugart, H. H. and Krankina, O. N.: Assessment of carbon stores in tree biomass for two management scenarios in Russia, *Environ. Res. Lett.*, 8(4), 1–9, doi:10.1088/1748-9326/8/4/045019, 2013.
- Siewert, M. B., Hanisch, J., Weiss, N., Kuhry, P., Maximov, T.C. and Hugelius G. (2015), Comparing carbon storage of Siberian tundra and taiga permafrost ecosystems at very high spatial resolution, *J. Geophys. Res. Biogeosci.*, 120, 1973–1994, doi:10.1002/2015JG002999.
- Soja, A. J., Shugart, H. H., Sukhinin, A., Conard, S. and Stackhouse, P. W.: Satelliet-Derived Mean Fire Return Intervals As Indicators of Change in Siberia ( 1995 – 2002 ), *Mitig. Adapt. Strateg. Glob. Chang.*, 75–96, 2006.
- Soja, A. J., Tchebakova, N. M., French, N. H. F., Flannigan, M. D., Shugart, H. H., Stocks, B. J., Sukhinin, A. I., Parfenova, E. I., Chapin, F. S. and Stackhouse, P. W.: Climate-induced boreal forest change: Predictions versus current observations, *Glob. Planet. Change*, 56(3–4), 274–296, doi:10.1016/j.gloplacha.2006.07.028, 2007.
- Stolbovoi, V.: Soil carbon in the forests of Russia, *Mitig. Adapt. Strateg. Glob. Chang.*, 11(1), 203–222, doi:10.1007/s11027-006-1021-7, 2006.
- Strauss, J., Schirrmeister, L., Grosse, G., Wetterich, S., Ulrich, M., Herzsuh, U. and Hubberten, H. W.: The deep permafrost carbon pool of the Yedoma region in Siberia and Alaska, *Geophys. Res. Lett.*, 40(23), 6165–6170, doi:10.1002/2013GL058088, 2013.
- Sturm, M., Schimel, J., Michaelson, G., Welker, J. M., Oberbauer, S. F., Liston, G. E., Fahnestock, J. and Romanovsky, V. E.: Winter Biological Processes Could Help Convert Arctic Tundra to Shrubland, *Bioscience*, 55(1), 17, doi:10.1641/0006-

- 3568(2005)055[0017:WBPCHC]2.0.CO;2, 2005.
- Swann, A. L., Fung, I. Y., Levis, S., Bonan, G. B. and Doney, S. C.: Changes in Arctic vegetation amplify high-latitude warming through the greenhouse effect, *Proc. Natl. Acad. Sci.*, 107(4), 1295–1300, doi:10.1073/pnas.0913846107, 2010.
- Tarnocai, C., Canadell, J. G., Schuur, E. a. G., Kuhry, P., Mazhitova, G. and Zimov, S.: Soil organic carbon pools in the northern circumpolar permafrost region, *Global Biogeochem. Cycles*, 23(2), doi:10.1029/2008GB003327, 2009.
- Tautenhahn, S., Lichstein, J. W., Jung, M., Kattge, J., Bohlman, S. A., Heilmeier, H., Prokushkin, A., Kahl, A. and Wirth, C.: Dispersal limitation drives successional pathways in Central Siberian forests under current and intensified fire regimes, *Glob. Chang. Biol.*, 22(6), 2178–2197, doi:10.1111/gcb.13181, 2016.
- Ter-Mikaelian, M. T., Colombo, S. J. and Chen, J.: Amount of downed woody debris and its prediction using stand characteristics in boreal and mixedwood forests of Ontario, Canada, *Can. J. For. Res.*, 38(8), 2189–2197, doi:10.1139/X08-067, 2008.
- Trahan, M. W. and Schubert, B. A.: Temperature-induced water stress in high-latitude forests in response to natural and anthropogenic warming, *Glob. Chang. Biol.*, 22(2), 782–791, doi:10.1111/gcb.13121, 2016.
- Trumbore, S. E. and Harden, J. W.: Accumulation and turnover of carbon in organic and mineral soils of the BOREAS northern study area, *J. Geophys. Res.*, 102(D24), 817–28, 1997.
- Turetsky, M. R., Mack, M. C., Hollingsworth, T. N. and Harden, J. W.: The role of mosses in ecosystem succession and function in Alaska’s boreal forest, *Can. J. For. Res.*, 40(7), 1288–1301, doi:10.1139/X10-081, 2010.
- Ulrich, M., Grosse, G., Strauss, J. and Schirrmeister, L.: Quantifying Wedge-Ice Volumes in Yedoma and Thermokarst Basin Deposits, *Permafr. Periglac. Process.*, 25, 151–161, doi:10.1002/ppp.1810, 2014.
- Vitharana, U. W. A., Mishra, U., Jastrow, J. D., Matamala, R. and Fan, Z.: Observational needs for estimating Alaskan soil carbon stocks under current and future climate, *J. Geophys. Res. Biogeosci.*, 122, 415–429, doi:10.1002/2016JG003421, 2017..
- Walker, X. J., Mack, M. C. and Johnstone, J. F.: Stable carbon isotope analysis reveals widespread drought stress in boreal black spruce forests, *Glob. Chang. Biol.*, 21(8), 3102–3113, doi:10.1111/gcb.12893, 2015.
- Walter Anthony, K. M., Zimov, S. a., Grosse, G., Jones, M. C., Anthony, P. M., Iii, F. S. C., Finlay, J. C., Mack, M. C., Davydov, S., Frenzel, P. and Frolking, S.: A shift of thermokarst lakes from carbon sources to sinks during the Holocene epoch, *Nature*, 511(7510), 452–456, doi:10.1038/nature13560, 2014.
- Wardle, D. A., Nilsson, M. C., Zackrisson, O. and Gallet, C.: Determinants of litter mixing effects in a Swedish boreal forest, *Soil Biol. Biochem.*, 35(6), 827–835, doi:10.1016/S0038-0717(03)00118-4, 2003.
- Yoshikawa, K., Bolton, W. R., Romanovsky, V. E., Fukuda, M. and Hinzman, L. D.: Impacts of wildfire on the permafrost in the boreal forests of Interior Alaska, *J. Geophys. Res.*, 108(D1), 16–17, doi:10.1029/2001JD000438, 2002.
- Zimov, S. A., Davydov, S. P., Zimova, G. M., Davydova, A. I., Schuur, E. A. G., Dutta, K. and Chapin, I. S.: Permafrost carbon: Stock and decomposability of a globally significant carbon pool, *Geophys. Res. Lett.*, 33(20), 1–5, doi:10.1029/2006GL027484, 2006.
- Zuur, A. F., Ieno, E. N., Walker, N. J., Saveliev, A. A. and Smith, G. M.: *Mixed Effects Models and Extensions in Ecology with R*, 2009.

**FIGURE DESCRIPTIONS**

**Figure 1.** Location of the Y4 watershed in relation to Russia (inset) and location of the sampling sites within the Y4 catchment.

**Figure 2.** Average carbon density of all sites in the Y4 watershed (top: above and belowground to 1 m; bottom: aboveground only). Bars indicate standard error.

**Figure 3.** Relationship between thaw depth and stand age. Each point represents the average thaw depth measurement taken along a transect (three transects/site) and the stand age of the entire site.

**Figure 4.** Relationship between SOC in the top 10 cm of soil and moisture, moss cover, and lichen cover. Each point represents the average SOC measured at each transect (three transects/site) and its corresponding moisture content or the average moss or lichen cover measured at that transect.

**Figure 5.** Bulk density, carbon density, and ice content of the two deep (15 m) permafrost soil cores.



**Table 1:** Site Characteristics. All sites were in forested areas except #17 (riparian); Site #18 (alas) had few scattered trees located along one end of the sampling transects.

| Site Number | Latitude (Degrees North) | Longitude (Degrees East) | Slope (Degrees) | Aspect (Degrees) | Summer Insolation (WH m <sup>-2</sup> ) | Mean Stand Age (yrs) |
|-------------|--------------------------|--------------------------|-----------------|------------------|-----------------------------------------|----------------------|
| 1           | 68.74747                 | 161.38988                | 5               | 160              | 4507                                    | 155                  |
| 2           | 68.74529                 | 161.38908                | 10              | 8                | 3950                                    | 167                  |
| 3           | 68.74472                 | 161.41486                | 14              | 249              | 4399                                    | 203                  |
| 4           | 68.74164                 | 161.41562                | 9               | 245              | 4409                                    | 23                   |
| 5           | 68.74834                 | 161.41350                | 10              | 357              | 3954                                    | 218                  |
| 6           | 68.74939                 | 161.41759                | 8               | 225              | 4509                                    | 205                  |
| 7           | 68.74915                 | 161.39000                | 5               | 57               | 4239                                    | 155                  |
| 8           | 68.74932                 | 161.38820                | 7               | 36               | 4132                                    | 208                  |
| 9           | 68.75267                 | 161.38544                | 8               | 340              | 4038                                    | 202                  |
| 10          | 68.75352                 | 161.39455                | 16              | 72               | 4008                                    | 211                  |
| 11          | 68.74869                 | 161.40834                | 10              | 222              | 4533                                    | 123                  |
| 12          | 68.74837                 | 161.40237                | 10              | 63               | 4121                                    | 71                   |
| 13          | 68.74660                 | 161.40433                | 17              | 61               | 3856                                    | 179                  |
| 14          | 68.74513                 | 161.40063                | 1               | 103              | 4361                                    | 40                   |
| 15          | 68.75188                 | 161.39095                | 3               | 237              | 4410                                    | 221                  |
| 16          | 68.75519                 | 161.40013                | 3               | 294              | 4307                                    | 200                  |
| 17          | 68.74152                 | 161.41411                | 8               | 225              | 4479                                    | -                    |
| 18          | 68.74632                 | 161.38776                | 3               | 84               | 4314                                    | -                    |
| 19          | 68.74479                 | 161.38410                | 6               | 61               | 4231                                    | 26                   |
| 20          | 68.74333                 | 161.40688                | 5               | 124              | 4429                                    | -                    |

**Table 2: LAI, tree and snag density, and percent cover of the 20 plots in the Y4 watershed. Values in parenthesis are standard error of the mean. Other cover includes woody debris and bare ground.**

| Site Number | Leaf Area Index (Hemispherical Photography) | Leaf Area Index (LAI-2000) | Larch Density (# trees/m <sup>2</sup> ) | Snag Density (# snags/m <sup>2</sup> ) | Canopy Cover (%) | Understory Shrub Cover (%) | Herbaceous cover (%) | Moss Cover (%) | Lichen Cover (%) | Other Cover (%) |
|-------------|---------------------------------------------|----------------------------|-----------------------------------------|----------------------------------------|------------------|----------------------------|----------------------|----------------|------------------|-----------------|
| 1           | 0.03 (0.00)                                 | 0.13                       | 0.09 (0.05)                             | 0.00                                   | 22.4 (3.2)       | 45.2 (2.7)                 | 3.5 (1.7)            | 22.0 (3.4)     | 15.6 (4.9)       | 12.4 (3.4)      |
| 2           | 0.22 (0.02)                                 | 0.13                       | 0.04 (0.00)                             | 0.00                                   | 16.0 (4.0)       | 49.4 (5.4)                 | 4.8 (2.4)            | 25.0 (4.4)     | 6.9 (2.9)        | 13.8 (6.0)      |
| 3           | 0.53 (0.03)                                 | 0.68                       | 0.08 (0.03)                             | 0.00                                   | 43.2 (7.4)       | 60.3 (9.0)                 | 0.7 (0.3)            | 31.3 (9.4)     | 3.4 (2.6)        | 4.3 (0.6)       |
| 4           | 0.02 (0.01)                                 | 0.00                       | 0.08 (0.07)                             | 0.00                                   | 2.6 (2.6)        | 72.3 (7.9)                 | 2.5 (1.6)            | 7.4 (2.4)      | 3.4 (2.1)        | 14.3 (5.7)      |
| 5           | 0.37 (0.05)                                 | 1.35                       | 0.08 (0.02)                             | 0.03 (0.01)                            | 32.3 (7.6)       | 51.5 (4.9)                 | 4.2 (1.4)            | 14.4 (2.9)     | 16.9 (4.1)       | 13.1 (2.4)      |
| 6           | 0.38 (0.03)                                 | 0.47                       | 0.06 (0.01)                             | 0.03 (0.01)                            | 26.0 (4.6)       | 57.9 (7.2)                 | 8.4 (5.9)            | 17.4 (5.2)     | 3.6 (1.3)        | 12.1 (3.8)      |
| 7           | 0.15 (0.08)                                 | 0.00                       | 0.05 (0.02)                             | 0.00                                   | 17.6 (8.4)       | 34.8 (3.5)                 | 3.4 (0.8)            | 34.0 (7.1)     | 22.8 (6.4)       | 4.8 (1.9)       |
| 8           | 0.06 (0.04)                                 | 0.29                       | 0.02 (0.00)                             | 0.00                                   | 7.0 (2.1)        | 34.8 (4.5)                 | 3.8 (1.8)            | 32.5 (7.9)     | 24.8 (9.5)       | 4.0 (2.3)       |
| 9           | 0.07 (0.02)                                 | 0.00                       | 0.01 (0.00)                             | 0.00                                   | 9.4 (1.6)        | 44.2 (5.5)                 | 0.0                  | 33.5 (5.0)     | 16.7 (7.6)       | 5.6 (1.6)       |
| 10          | 0.30 (0.09)                                 | 1.41                       | 0.08 (0.04)                             | 0.04 (0.02)                            | 24.3 (6.2)       | 49.2 (10.6)                | 8.6 (2.9)            | 29.8 (8.8)     | 5.3 (1.4)        | 7.1 (2.5)       |
| 11          | 0.05 (0.03)                                 | 0.22                       | 0.02 (0.01)                             | 0.00                                   | 4.7 (1.5)        | 33.6 (6.9)                 | 5.8 (3.0)            | 15.3 (4.5)     | 30.6 (8.0)       | 15.0 (5.9)      |
| 12          | 0.01 (0.00)                                 | 0.00                       | 0.02 (0.01)                             | 0.00                                   | 0.0 (0.0)        | 47.1 (7.4)                 | 7.5 (4.0)            | 20.2 (3.7)     | 19.0 (5.3)       | 6.9 (3.2)       |
| 13          | 0.23 (0.07)                                 | 0.82                       | 0.07 (0.01)                             | 0.02 (0.01)                            | 18.9 (3.0)       | 47.4 (8.1)                 | 4.2 (2.6)            | 25.6 (8.2)     | 13.6 (6.2)       | 9.1 (0.8)       |
| 14          | 0.00 (0.00)                                 | 0.00                       | 0.03 (0.02)                             | 0.00                                   | 0.8 (0.8)        | 47.2 (12.0)                | 5.8 (3.7)            | 11.3 (3.8)     | 33.5 (13.9)      | 2.3 (1.1)       |
| 15          | 0.03 (0.01)                                 | 0.00                       | 0.02 (0.01)                             | 0.00                                   | 3.8 (1.0)        | 41.3 (3.9)                 | 3.8 (1.7)            | 22.4 (4.5)     | 21.9 (4.6)       | 10.4 (5.5)      |
| 16          | 0.31 (0.13)                                 | 0.88                       | 0.05 (0.01)                             | 0.00                                   | 18.5 (7.7)       | 35.6 (7.6)                 | 2.2 (0.6)            | 32.2 (11.6)    | 25.9 (9.0)       | 4.1 (1.5)       |
| 17          | -                                           | -                          | 0.0                                     | 0.00                                   | 13.9 (13.9)      | 65.8 (15.1)                | 11.1 (4.4)           | 0.1 (0.1)      | 0.1 (0.1)        | 23.4 (11.5)     |
| 18          | -                                           | -                          | 0.01 (0.01)                             | 0.00                                   | 5.2              | 51.9 (6.5)                 | 12.5 (4.1)           | 32.0 (5.0)     | 0.2 (0.2)        | 3.3 (1.9)       |
| 19          | -                                           | 2.03                       | 0.43 (0.28)                             | 0.00                                   | 16.2 (2.2)       | -                          | -                    | -              | -                | -               |
| 20          | -                                           | -                          | 0.06 (0.03)                             | 0.04 (0.02)                            | 6.1 (1.3)        | -                          | -                    | -              | -                | -               |

**Table 3:** Aboveground biomass (g C m<sup>-2</sup>) at each of the plots in the Y4 watershed. Total aboveground biomass is the sum of the larch, understory vascular, standing dead tree, and woody debris biomass. Understory vascular biomass does not include lichen and moss. Values in parenthesis are standard error of the mean.

| Site Number | Larch      | Understory vascular | Shrub       | Standing dead tree | Woody debris | Total live  | Total dead | Total Aboveground |
|-------------|------------|---------------------|-------------|--------------------|--------------|-------------|------------|-------------------|
| 1           | 392 (313)  | 112 (41)            | 52 (52)     | 0 (0)              | 322 (87)     | 504 (304)   | 322 (87)   | 826 (389)         |
| 2           | 603 (244)  | 140 (50)            | 75 (40)     | 0 (0)              | 76 (7)       | 744 (213)   | 76 (7)     | 820 (217)         |
| 3           | 743 (125)  | 320 (106)           | 209 (146)   | 0 (0)              | 86 (15)      | 1063 (230)  | 86 (15)    | 1149 (235)        |
| 4           | 67 (66)    | 611 (166)           | 529 (176)   | 0 (0)              | 59 (17)      | 679 (153)   | 59 (17)    | 737 (167)         |
| 5           | 1362 (516) | 193 (27)            | 96 (32)     | 219 (96)           | 122 (28)     | 1555 (490)  | 341 (105)  | 1896 (579)        |
| 6           | 1340 (635) | 257 (81)            | 146 (69)    | 386 (236)          | 131 (50)     | 1597 (560)  | 517 (218)  | 2114 (361)        |
| 7           | 263 (65)   | 271 (86)            | 209 (73)    | 0 (0)              | 24 (8)       | 533 (45)    | 24 (8)     | 557 (52)          |
| 8           | 471 (303)  | 170 (115)           | 124 (108)   | 27 (27)            | 10 (3)       | 641 (294)   | 37 (29)    | 678 (319)         |
| 9           | 122 (68)   | 176 (93)            | 64 (35)     | 0 (0)              | 37 (11)      | 298 (60)    | 37 (11)    | 335 (65)          |
| 10          | 697 (405)  | 183 (64)            | 51 (51)     | 262 (140)          | 106 (16)     | 880 (400)   | 368 (153)  | 1248 (501)        |
| 11          | 227 (201)  | 185 (87)            | 95 (95)     | 0 (0)              | 62 (17)      | 413 (285)   | 62 (17)    | 475 (278)         |
| 12          | 6 (6)      | 116 (39)            | 22 (13)     | 0 (0)              | 18 (4)       | 122 (45)    | 18 (4)     | 140 (45)          |
| 13          | 698 (124)  | 139 (25)            | 32 (18)     | 93 (69)            | 306 (189)    | 837 (126)   | 399 (146)  | 1236 (217)        |
| 14          | 5 (4)      | 253 (184)           | 169 (152)   | 0 (0)              | 16 (2)       | 259 (183)   | 16 (2)     | 275 (181)         |
| 15          | 142 (85)   | 180 (41)            | 82 (48)     | 0 (0)              | 71 (63)      | 322 (59)    | 71 (63)    | 393 (6)           |
| 16          | 984 (491)  | 470 (256)           | 417 (261)   | 0 (0)              | 56 (21)      | 1454 (628)  | 56 (21)    | 1510 (633)        |
| 17          | 0 (0)      | 2657 (2575)         | 2621 (2588) | 0 (0)              | 118 (72)     | 2657 (2575) | 118 (72)   | 2775 (2642)       |
| 18          | 2 (2)      | 263 (46)            | 245 (42)    | 0 (0)              | 16 (5)       | 265 (47)    | 16 (5)     | 281 (50)          |
| 19          | 35 (21)    | 465 (172)           | 382 (177)   | 0 (0)              | 116 (45)     | 500 (159)   | 116 (45)   | 615 (196)         |
| 20          | 585 (217)  | 321 (163)           | 156 (105)   | 47 (26)            | 158 (140)    | 906 (173)   | 205 (118)  | 1111 (244)        |

852

**Table 4:** Soil carbon in the Y4 watershed. Thawed soil cores were sampled from 6 locations per site. Permafrost cores were sampled to 1 m at 7 sites (3/site). Root C and Soil C values were normalized to 10 cm. The combined soil C value is the amount of C in the top 10 cm of soil, regardless of soil type (mineral/organic). Carbon pools from the permafrost cores include active layer soil (0-30 or 0-100 cm from top of ground surface). Values in parenthesis are standard error of the mean.

| Site Number | Thawed Soil Cores             |           |                                |             |             | Permafrost Cores                      |                                        |
|-------------|-------------------------------|-----------|--------------------------------|-------------|-------------|---------------------------------------|----------------------------------------|
|             | Root C (g C m <sup>-2</sup> ) |           | Soil C (kg C m <sup>-2</sup> ) |             |             | C in top 30 cm (g C m <sup>-3</sup> ) | C in top 100 cm (g C m <sup>-3</sup> ) |
|             | Organic                       | Mineral   | Organic                        | Mineral     | Combined    |                                       |                                        |
| 1           | 137 (27)                      | 0         | 2.60 (0.27)                    | 2.03 (0.21) | 2.34 (0.22) | 4.69 (0.06)                           | 9.36 (0.09)                            |
| 2           | 97 (60)                       | 0         | 1.35 (0.11)                    | 1.46 (0.32) | 1.32 (0.12) | 3.67 (0.34)                           | 10.16 (0.60)                           |
| 3           | 108 (42)                      | 0         | 1.86 (0.32)                    | 1.43 (0.19) | 1.83 (0.29) |                                       |                                        |
| 4           | 169 (183)                     | 0         | 2.06 (0.47)                    | 2.06 (0.22) | 2.49 (0.48) |                                       |                                        |
| 5           | 453 (108)                     | 0         | 4.47 (1.74)                    | 1.57 (0.05) | 3.42 (0.76) |                                       |                                        |
| 6           | 230 (169)                     | 0         | 3.86 (1.03)                    | 2.22 (0.43) | 3.71 (0.93) |                                       |                                        |
| 7           | 44 (22)                       | 0         | 1.13 (0.22)                    | 2.31 (0.41) | 1.14 (0.22) | 4.29 (0.32)                           | 10.48 (0.67)                           |
| 8           | 69 (25)                       | 0         | 1.25 (0.12)                    | 2.79 (0.67) | 1.38 (0.19) |                                       |                                        |
| 9           | 177 (17)                      | 45 (31)   | 2.51 (0.26)                    | 1.54 (0.33) | 2.41 (0.40) | 4.85 (0.36)                           | 8.63 (0.71)                            |
| 10          | 278 (35)                      | 0         | 2.12 (0.45)                    | 1.36 (0.12) | 2.10 (0.46) | 4.82 (0.44)                           | 9.39 (0.06)                            |
| 11          | 520 (346)                     | 6 (4)     | 1.63 (0.42)                    | 2.02 (0.16) | 1.66 (0.30) |                                       |                                        |
| 12          | 271 (87)                      | 0         | 1.39 (0.04)                    | 3.26 (0.83) | 1.51 (0.05) |                                       |                                        |
| 13          | 267 (30)                      | 0         | 1.65 (0.28)                    | 1.96 (0.29) | 1.66 (0.29) |                                       |                                        |
| 14          | 252 (74)                      | 6 (4)     | 3.12 (0.47)                    | 1.31 (0.26) | 2.74 (0.15) |                                       |                                        |
| 15          | 103 (8)                       | 0         | 2.04 (0.58)                    | 2.15 (0.53) | 1.84 (0.38) |                                       |                                        |
| 16          | 189 (184)                     | 20 (11)   | 1.70 (0.57)                    | 2.08 (0.49) | 1.66 (0.33) | 5.32 (1.19)                           | 11.90 (3.83)                           |
| 17          | 0                             | 97 (35)   | -                              | 2.37 (0.21) | 2.76 (0.78) |                                       |                                        |
| 18          | 95 (36)                       | 0         | 2.19 (0.40)                    | 2.66 (2.21) | 1.49 (0.55) |                                       |                                        |
| 19          | 205 (91)                      | 203 (152) | 3.51 (0.47)                    | 2.74 (1.23) | 2.85 (0.72) |                                       |                                        |
| 20          | 0                             | 0         | 2.44 (0.70)                    | 1.41 (0.26) | 1.85 (0.43) | 5.70 (0.55)                           | 11.91 (0.90)                           |

**Table 5:** Soil properties from thawed surface soils in the Y4 watershed. The mineral layer was collected to approximately 10 cm below the organic layer (see methods). No relationship existed between sample date and thaw depth or sample date and water content. Values in parenthesis are standard error.

| Site Number | Thaw depth (cm) | Organic Layer Depth (cm) | Bulk Density (g cm <sup>-3</sup> ) |             | Gravimetric Water Content (%) |              | Carbon Content (%) |           |
|-------------|-----------------|--------------------------|------------------------------------|-------------|-------------------------------|--------------|--------------------|-----------|
|             |                 |                          | Organic                            | Mineral     | Organic                       | Mineral      | Organic            | Mineral   |
| 1           | 23 (1)          | 13 (1)                   | 0.078 (0.021)                      | 0.52 (0.16) | 198.9 (34.4)                  | 64.7 (17.4)  | 37.6 (3.5)         | 6.9 (2.5) |
| 2           | 22 (1)          | 11 (1)                   | 0.040 (0.011)                      | 0.64 (0.05) | 203.8 (28.0)                  | 33.9 (5.8)   | 38.3 (4.1)         | 2.4 (0.5) |
| 3           | 24 (1)          | 14 (1)                   | 0.062 (0.011)                      | 0.70 (0.11) | 103.3 (16.2)                  | 29.1 (4.4)   | 30.4 (2.2)         | 2.3 (0.6) |
| 4           | 41 (2)          | 10 (1)                   | 0.148 (0.063)                      | 0.54 (0.14) | 107.3 (28.9)                  | 61.0 (15.6)  | 26.6 (4.0)         | 8.7 (3.0) |
| 5           | 23 (1)          | 8 (1)                    | 0.120 (0.032)                      | 1.02 (0.08) | 220.2 (23.1)                  | 25.6 (2.1)   | 39.2 (3.2)         | 1.6 (0.3) |
| 6           | 21 (2)          | 9 (1)                    | 0.113 (0.039)                      | 0.63 (0.05) | 182.0 (19.8)                  | 34.2 (6.1)   | 39.0 (3.0)         | 3.8 (1.0) |
| 7           | 21 (1)          | 12 (1)                   | 0.026 (0.005)                      | 0.76 (0.18) | 348.5 (48.4)                  | 43.6 (10.2)  | 44.4 (2.0)         | 3.9 (1.2) |
| 8           | 16 (1)          | 11 (1)                   | 0.027 (0.002)                      | 0.68 (0.10) | 304.9 (32.1)                  | 46.4 (10.3)  | 46.7 (0.6)         | 4.4 (1.1) |
| 9           | 26 (2)          | 13 (1)                   | 0.082 (0.010)                      | 0.64 (0.12) | 171.3 (29.5)                  | 46.5 (11.2)  | 30.9 (4.4)         | 5.5 (2.1) |
| 10          | 23 (1)          | 11 (1)                   | 0.048 (0.007)                      | 0.89 (0.05) | 272.6 (15.2)                  | 26.5 (1.7)   | 43.6 (1.9)         | 1.6 (0.2) |
| 11          | 35 (2)          | 10 (1)                   | 0.060 (0.023)                      | 0.84 (0.12) | 142.8 (17.8)                  | 39.4 (6.9)   | 30.5 (3.3)         | 3.6 (1.6) |
| 12          | 29 (2)          | 10 (1)                   | 0.053 (0.020)                      | 0.67 (0.10) | 247.7 (17.5)                  | 58.3 (10.7)  | 43.5 (1.8)         | 5.0 (1.0) |
| 13          | 29 (1)          | 12 (1)                   | 0.042 (0.008)                      | 0.71 (0.11) | 194.1 (15.4)                  | 48.6 (12.6)  | 40.0 (1.4)         | 4.0 (1.0) |
| 14          | 42 (2)          | 8 (1)                    | 0.103 (0.016)                      | 0.82 (0.10) | 165.8 (14.7)                  | 31.0 (7.2)   | 32.4 (3.8)         | 3.0 (1.6) |
| 15          | 28 (2)          | 12 (1)                   | 0.150 (0.099)                      | 0.92 (0.10) | 419.1 (105.4)                 | 39.9 (10.6)  | 38.3 (3.5)         | 2.6 (0.9) |
| 16          | 24 (1)          | 12 (1)                   | 0.042 (0.009)                      | 0.76 (0.18) | 256.3 (38.8)                  | 49.5 (15.8)  | 40.2 (2.1)         | 5.9 (3.4) |
| 17          | 45 (2)          | 9 (2)                    | -                                  | 0.46 (0.11) | -                             | 50.9 (7.6)   | -                  | 8.7 (2.8) |
| 18          | 26 (1)          | 18 (1)                   | 0.059 (0.012)                      | 0.39 (0.20) | 346.8 (45.4)                  | 123.2 (31.2) | 39.9 (3.3)         | 8.7 (2.6) |
| 19          | 36 (2)          | 14 (2)                   | 0.078 (0.022)                      | 1.40 (0.09) | 204.9 (52.3)                  | 22.8 (0.4)   | 33.5 (3.4)         | 1.0 (0.1) |
| 20          | 29 (1)          | 9 (1)                    | 0.118 (0.001)                      | 0.65 (0.31) | 252.9 (76.6)                  | 76.1 (28.4)  | 29.9 (4.4)         | 8.6 (4.9) |

**Table S4.** Soil characteristics of surface permafrost cores (frozen active layer and surface permafrost; type=F) and thawed active layer mineral soils (type=TM) in the Y4 watershed. Depths reflect distance from the top of the mineral layer. Soil carbon pools are reported for each depth increment. Active layer organic soil data are in Table S2.

| Site | Core | Type | Depth (cm)  | Organic Matter Content (%) | Carbon Content (%) | Gravimetric Water Content (%) | Bulk Density (g cm <sup>-3</sup> ) | Soil C (kg m <sup>-2</sup> ) |
|------|------|------|-------------|----------------------------|--------------------|-------------------------------|------------------------------------|------------------------------|
| 1    | 1    | TM   | 0-28        | 3.66                       | 1.34               | 24                            | 1.04                               | 3.92                         |
| 1    | 1    | TM   | 28-51       | 2.77                       | 0.88               | 24                            | 0.84                               | 1.69                         |
| 1    | 1    | F    | 51-60       | 2.58                       | 0.78               | 78                            | 0.93                               | 0.72                         |
| 1    | 1    | F    | 60-70       | 2.60                       | 0.79               | 96                            | 0.88                               | 0.70                         |
| 1    | 1    | F    | 70-82       | 3.04                       | 1.02               | 198                           | 0.42                               | 0.51                         |
| 1    | 1    | F    | 82-92       | 2.87                       | 0.93               | 116                           | 0.60                               | 0.56                         |
| 1    | 1    | F    | 92-102.5    | 2.67                       | 0.82               | 109                           | 0.55                               | 0.48                         |
| 1    | 1    | F    | 102.5-108.5 | 2.61                       | 0.79               | 117                           | 0.63                               | 0.79                         |
| 1    | 2    | TM   | 0-26        | 3.80                       | 1.42               | 25                            | 0.83                               | 3.05                         |
| 1    | 2    | TM   | 26-39       | 3.15                       | 1.07               | 24                            | 1.12                               | 1.57                         |
| 1    | 2    | F    | 39-50       | 2.51                       | 0.74               | 69                            | 0.84                               | 0.68                         |
| 1    | 2    | F    | 50-60       | 2.50                       | 0.74               | 127                           | 0.67                               | 0.50                         |
| 1    | 2    | F    | 60-71       | 2.24                       | 0.60               | 72                            | 0.93                               | 0.61                         |
| 1    | 2    | F    | 71-81       | 2.39                       | 0.68               | 89                            | 0.78                               | 0.53                         |
| 1    | 2    | F    | 81-91       | 2.31                       | 0.63               | 76                            | 0.81                               | 0.52                         |
| 1    | 2    | F    | 91-102      | 2.67                       | 0.83               | 68                            | 0.91                               | 0.83                         |
| 1    | 2    | F    | 102-112     | 2.69                       | 0.84               | 77                            | 0.85                               | 0.71                         |
| 1    | 2    | F    | 112-121     | 3.04                       | 1.02               | 70                            | 0.83                               | 0.76                         |
| 1    | 3    | TM   | 0-27        | 4.15                       | 1.60               | 29                            | 0.70                               | 3.02                         |
| 1    | 3    | TM   | 27-45       | 2.75                       | 0.86               | 22                            | 1.08                               | 1.67                         |
| 1    | 3    | F    | 45-50       | -                          | 1.32               | 32                            | 1.13                               | 0.66                         |
| 1    | 3    | F    | 50-60       | 2.11                       | 0.53               | 72                            | 1.00                               | 0.47                         |
| 1    | 3    | F    | 60-71       | 2.66                       | 0.82               | 114                           | 0.76                               | 0.52                         |
| 1    | 3    | F    | 71-81       | 2.63                       | 0.80               | 79                            | 0.87                               | 0.67                         |
| 1    | 3    | F    | 81-90       | 2.73                       | 0.85               | 116                           | 0.73                               | 0.42                         |
| 1    | 3    | F    | 90-101      | 2.73                       | 0.85               | 114                           | 0.70                               | 0.57                         |
| 1    | 3    | F    | 101-112     | 2.70                       | 0.84               | 96                            | 0.61                               | 0.59                         |
| 2    | 1    | TM   | 0-38        | 4.03                       | 1.54               | 30                            | 0.64                               | 3.74                         |
| 2    | 1    | F    | 38-51       | 5.20                       | 2.15               | 50                            | 1.20                               | 3.35                         |
| 2    | 1    | F    | 51-60       | 3.69                       | 1.36               | 134                           | 0.53                               | 0.65                         |
| 2    | 1    | F    | 60-69       | -                          | 1.26               | 129                           | 0.50                               | 0.57                         |
| 2    | 1    | F    | 69-81       | 3.32                       | 1.17               | 130                           | 0.59                               | 0.83                         |
| 2    | 1    | F    | 81-90       | 2.53                       | 0.75               | 108                           | 0.73                               | 0.49                         |
| 2    | 1    | F    | 90-99       | 2.52                       | 0.75               | 127                           | 0.59                               | 0.40                         |
| 2    | 1    | F    | 99-109.5    | 2.24                       | 0.60               | 148                           | 0.56                               | 0.35                         |
| 2    | 2    | TM   | 0-26        | 2.98                       | 0.98               | 22                            | 1.00                               | 2.57                         |
| 2    | 2    | TM   | 26-42       | 3.11                       | 1.05               | 28                            | 0.87                               | 1.47                         |
| 2    | 2    | F    | 42-50       | 2.89                       | 0.94               | 66                            | 0.97                               | 0.73                         |
| 2    | 2    | F    | 50-60       | 2.76                       | 0.87               | 75                            | 0.78                               | 0.68                         |
| 2    | 2    | F    | 60-74       | 3.26                       | 1.13               | 105                           | 0.69                               | 1.03                         |
| 2    | 2    | F    | 74-84       | 2.66                       | 0.82               | 89                            | 0.85                               | 0.69                         |

**Table S4.** Soil characteristics of surface permafrost cores (frozen active layer and surface permafrost; type=F) and thawed active layer mineral soils (type=TM) in the Y4 watershed. Depths reflect distance from the top of the mineral layer. Soil carbon pools are reported for each depth increment. Active layer organic soil data are in Table S2.

|   |   |    |         |       |      |     |      |      |
|---|---|----|---------|-------|------|-----|------|------|
| 2 | 2 | F  | 84-95   | 2.64  | 0.81 | 105 | 0.70 | 0.62 |
| 2 | 2 | F  | 95-104  | 3.78  | 1.41 | 81  | 0.81 | 1.03 |
| 2 | 2 | F  | 104-111 | 4.02  | 1.53 | 71  | 0.87 | 0.94 |
| 2 | 3 | TM | 0-29    | 4.60  | 1.83 | 35  | 0.81 | 4.30 |
| 2 | 3 | F  | 29-40   | 3.34  | 1.18 | 80  | 1.15 | 1.49 |
| 2 | 3 | F  | 40-49   | 2.82  | 0.90 | 169 | 0.46 | 0.37 |
| 2 | 3 | F  | 49-60   | 3.31  | 1.16 | 65  | 1.07 | 1.36 |
| 2 | 3 | F  | 60-68   | 2.99  | 0.99 | 103 | 0.72 | 0.57 |
| 2 | 3 | F  | 68-80   | 3.15  | 1.07 | 101 | 0.90 | 1.16 |
| 2 | 3 | F  | 80-90   | 3.31  | 1.16 | 114 | 0.60 | 0.69 |
| 2 | 3 | F  | 90-95   | 3.05  | 1.02 | 120 | 0.75 | 0.38 |
| 7 | 1 | TM | 0-23    | 4.09  | 1.57 | 31  | 0.92 | 3.32 |
| 7 | 1 | F  | 23-31   | 3.54  | 1.28 | 143 | 0.54 | 0.49 |
| 7 | 1 | F  | 31-38   | 3.35  | 1.18 | 372 | 0.31 | 0.17 |
| 7 | 1 | F  | 38-51   | 3.34  | 1.18 | 134 | 0.60 | 0.77 |
| 7 | 1 | F  | 51-62   | 3.07  | 1.03 | 45  | 1.19 | 1.07 |
| 7 | 1 | F  | 62-72   | 2.73  | 0.85 | 69  | 1.01 | 0.76 |
| 7 | 1 | F  | 72-81   | 4.20  | 1.63 | 85  | 0.87 | 1.06 |
| 7 | 2 | TM | 0-2.5   | 14.04 | 6.78 | 77  | 0.49 | 0.82 |
| 7 | 2 | F  | 2.5-12  | 5.13  | 2.11 | 44  | 1.04 | 2.05 |
| 7 | 2 | F  | 12-23   | 4.03  | 1.54 | 109 | 0.76 | 1.00 |
| 7 | 2 | F  | 23-33   | 3.46  | 1.24 | 147 | 0.65 | 0.61 |
| 7 | 2 | F  | 33-44   | 3.49  | 1.25 | 126 | 0.70 | 0.87 |
| 7 | 2 | F  | 44-55   | 3.96  | 1.50 | 62  | 0.81 | 1.35 |
| 7 | 2 | F  | 55-67   | 4.44  | 1.75 | 70  | 0.99 | 1.84 |
| 7 | 2 | F  | 67-79   | 5.34  | 2.22 | 190 | 0.38 | 0.87 |
| 7 | 2 | F  | 79-90   | 4.25  | 1.65 | 225 | 0.34 | 0.54 |
| 7 | 2 | F  | 90-103  | 3.01  | 1.00 | 142 | 0.60 | 0.68 |
| 7 | 3 | TM | 0-25.5  | 5.14  | 2.12 | 31  | 0.80 | 4.32 |
| 7 | 3 | TM | 25.5-29 | 3.68  | 1.36 | 24  | 2.71 | 1.28 |
| 7 | 3 | F  | 29-40   | 3.96  | 1.50 | 63  | 1.06 | 1.66 |
| 7 | 3 | F  | 40-51   | 3.20  | 1.10 | 87  | 0.77 | 0.78 |
| 7 | 3 | F  | 51-62   | 3.54  | 1.28 | 267 | 0.31 | 0.39 |
| 7 | 3 | F  | 62-71   | 2.40  | 0.68 | 102 | 0.83 | 0.37 |
| 7 | 3 | F  | 71-83   | 2.63  | 0.80 | 115 | 0.80 | 0.63 |
| 9 | 1 | TM | 0-19    | 3.65  | 1.33 | 25  | 0.74 | 1.88 |
| 9 | 1 | F  | 19-30   | 2.48  | 0.73 | 130 | 0.74 | 0.59 |
| 9 | 1 | F  | 30-41   | 2.51  | 0.74 | 53  | 0.82 | 0.67 |
| 9 | 1 | F  | 41-53   | 2.66  | 0.82 | 38  | 1.61 | 1.58 |
| 9 | 1 | F  | 53-63   | 2.38  | 0.67 | 81  | 0.74 | 0.50 |
| 9 | 1 | F  | 63-69   | 1.53  | 0.23 | 70  | 0.95 | 0.13 |
| 9 | 2 | TM | 0-30    | 2.92  | 0.95 | 20  | 1.14 | 3.25 |
| 9 | 2 | TM | 30-41.5 | 2.76  | 0.87 | 21  | 0.44 | 1.59 |
| 9 | 2 | F  | 41.5-49 | 1.97  | 0.46 | 65  | 0.94 | 0.32 |

**Table S4.** Soil characteristics of surface permafrost cores (frozen active layer and surface permafrost; type=F) and thawed active layer mineral soils (type=TM) in the Y4 watershed. Depths reflect distance from the top of the mineral layer. Soil carbon pools are reported for each depth increment. Active layer organic soil data are in Table S2.

|    |   |    |         |      |      |     |      |      |
|----|---|----|---------|------|------|-----|------|------|
| 9  | 2 | F  | 49-58   | 2.12 | 0.53 | 83  | 0.92 | 0.44 |
| 9  | 2 | F  | 58-67   | 2.14 | 0.54 | 120 | 0.58 | 0.29 |
| 9  | 2 | F  | 67-77   | 2.08 | 0.52 | 80  | 0.83 | 0.43 |
| 9  | 2 | F  | 77-86   | 2.00 | 0.47 | 100 | 0.69 | 0.29 |
| 9  | 2 | F  | 86-95   | 2.16 | 0.56 | 125 | 0.57 | 0.29 |
| 9  | 2 | F  | 95-102  | 2.20 | 0.58 | 77  | 0.76 | 0.31 |
| 9  | 3 | TM | 0-33.5  | 2.76 | 0.87 | 23  | 0.77 | 2.25 |
| 9  | 3 | F  | 34-40   | 2.41 | 0.69 | 43  | 0.87 | 0.36 |
| 9  | 3 | F  | 40-48   | 2.09 | 0.52 | 92  | 0.89 | 0.37 |
| 9  | 3 | F  | 48-58   | 2.00 | 0.47 | 197 | 0.78 | 0.37 |
| 9  | 3 | F  | 58-68   | 2.10 | 0.52 | 64  | 0.90 | 0.47 |
| 9  | 3 | F  | 68-82   | 2.05 | 0.50 | 98  | 0.74 | 0.52 |
| 10 | 1 | TM | 0-3.5   | 4.77 | 1.92 | 43  | 0.76 | 0.51 |
| 10 | 1 | F  | 3.5-11  | 2.07 | 0.51 | 42  | 1.18 | 0.44 |
| 10 | 1 | F  | 11-20   | 2.67 | 0.82 | 125 | 0.74 | 0.34 |
| 10 | 1 | F  | 20-32   | -    | 0.85 | 104 | 0.59 | 0.55 |
| 10 | 1 | F  | 32-40   | 2.77 | 0.88 | 103 | 0.66 | 0.40 |
| 10 | 1 | F  | 40-51   | 2.64 | 0.81 | 96  | 0.64 | 0.67 |
| 10 | 1 | F  | 51-65   | 3.86 | 1.45 | 223 | 0.39 | 0.79 |
| 10 | 2 | TM | 0-23.5  | 4.59 | 1.83 | 35  | 0.74 | 3.20 |
| 10 | 2 | F  | 23.5-30 | 4.54 | 1.80 | 50  | 1.18 | 1.38 |
| 10 | 2 | F  | 30-41   | 2.63 | 0.80 | 91  | 0.76 | 0.67 |
| 10 | 2 | F  | 41-51   | 2.31 | 0.64 | 173 | 0.49 | 0.31 |
| 10 | 2 | F  | 51-62   | 2.51 | 0.74 | 90  | 0.66 | 0.54 |
| 10 | 2 | F  | 62-72   | 2.40 | 0.68 | 212 | 0.29 | 0.20 |
| 10 | 2 | F  | 72-81   | 2.20 | 0.58 | 133 | 0.19 | 0.10 |
| 10 | 2 | F  | 81-91   | 2.52 | 0.74 | 82  | 0.84 | 0.62 |
| 10 | 3 | TM | 0-2.5   | 7.38 | 3.29 | 47  | 0.66 | 0.54 |
| 10 | 3 | F  | 2.5-9   | 2.05 | 0.50 | 57  | 1.01 | 0.32 |
| 10 | 3 | F  | 9-19    | 3.80 | 1.42 | 71  | 0.78 | 1.22 |
| 10 | 3 | F  | 19-29   | 3.71 | 1.37 | 111 | 0.58 | 0.78 |
| 10 | 3 | F  | 29-41   | 4.54 | 1.80 | 233 | 0.31 | 0.73 |
| 10 | 3 | F  | 41-51   | 4.93 | 2.01 | 155 | 0.45 | 0.87 |
| 10 | 3 | F  | 51-59   | 2.90 | 0.95 | 99  | 0.74 | 0.45 |
| 16 | 1 | TM | 0-33.5  | 2.98 | 0.98 | 23  | 0.54 | 1.79 |
| 16 | 1 | F  | 33.5-40 | 3.54 | 1.28 | 48  | 1.00 | 0.86 |
| 16 | 1 | F  | 40-50   | 3.16 | 1.08 | 85  | 0.82 | 0.71 |
| 16 | 1 | F  | 50-61   | 2.81 | 0.90 | 48  | 1.08 | 1.02 |
| 16 | 1 | F  | 61-72   | 3.59 | 1.31 | 84  | 0.53 | 0.87 |
| 16 | 1 | F  | 72-81   | 3.12 | 1.06 | 451 | 0.21 | 0.17 |
| 16 | 1 | F  | 81-88   | 3.28 | 1.15 | 655 | 0.16 | 0.10 |
| 16 | 2 | TM | 0-23    | 5.35 | 2.23 | 33  | 0.61 | 3.13 |
| 16 | 2 | F  | 23-30   | 3.10 | 1.05 | 46  | 1.35 | 0.99 |
| 16 | 2 | F  | 30-41   | 3.01 | 1.00 | 253 | 0.29 | 0.32 |



**Table S4.** Soil characteristics of surface permafrost cores (frozen active layer and surface permafrost; type=F) and thawed active layer mineral soils (type=TM) in the Y4 watershed. Depths reflect distance from the top of the mineral layer. Soil carbon pools are reported for each depth increment. Active layer organic soil data are in Table S2.

|    |   |    |         |       |      |     |      |       |
|----|---|----|---------|-------|------|-----|------|-------|
| 16 | 2 | F  | 41-52   | 4.07  | 1.56 | 598 | 0.17 | 0.29  |
| 16 | 2 | F  | 52-65   | 2.66  | 0.82 | 391 | 0.21 | 0.22  |
| 16 | 2 | F  | 65-70   | 3.34  | 1.18 |     | 0.07 | 0.04  |
| 16 | 2 | F  | 70-80   | 2.86  | 0.92 | 328 | 0.18 | 0.16  |
| 16 | 3 | TM | 0-29    | 14.86 | 4.76 | 22  | 0.86 | 12.54 |
| 16 | 3 | TM | 29-37.5 | 2.79  | 0.89 | 23  | 2.36 | 1.78  |
| 16 | 3 | F  | 37.5-49 | 3.43  | 1.22 | 136 | 0.53 | 0.75  |
| 16 | 3 | F  | 49-52   | 3.23  | 1.12 | 265 | 0.31 | 0.10  |
| 16 | 3 | F  | 52-63   | 5.78  | 2.46 | 168 | 0.54 | 1.09  |
| 16 | 3 | F  | 63-75   | 5.82  | 2.48 | 137 | 0.55 | 1.64  |
| 16 | 3 | F  | 75-87   | 3.76  | 1.39 | 178 | 0.46 | 0.69  |
| 20 | 1 | TM | 0-12    | 3.30  | 1.15 | 23  | 1.31 | 1.81  |
| 20 | 1 | F  | 12-28   | 2.52  | 0.74 | 27  | 0.97 | 1.16  |
| 20 | 1 | F  | 28-36   | 2.27  | 0.61 | 22  | 1.92 | 0.95  |
| 20 | 1 | F  | 36-46   | 2.26  | 0.61 | 43  | 1.40 | 0.86  |
| 20 | 1 | F  | 46-57   | 2.14  | 0.55 | 72  | 0.88 | 0.53  |
| 20 | 1 | F  | 57-68   | 2.03  | 0.49 | 149 | 0.54 | 0.29  |
| 20 | 2 | TM | 0-14    | 3.08  | 1.04 | 20  | 2.48 | 3.60  |
| 20 | 2 | TM | 14-24   | 2.35  | 0.66 | 21  | 1.22 | 0.80  |
| 20 | 2 | F  | 44-50   | 2.81  | 0.90 | 28  | 1.88 | 1.01  |
| 20 | 2 | F  | 50-60   | 2.19  | 0.57 | 62  | 1.04 | 0.60  |
| 20 | 2 | F  | 60-70   | 1.93  | 0.43 | 87  | 0.81 | 0.35  |
| 20 | 2 | F  | 70-78   | 2.06  | 0.51 | 92  | 0.89 | 0.36  |
| 20 | 3 | TM | 0-22    | 3.17  | 1.09 | 23  | 1.61 | 3.84  |
| 20 | 3 | TM | 22-33   | 3.17  | 1.08 | 23  | 1.45 | 1.73  |
| 20 | 3 | F  | 33-40   | 2.06  | 0.51 | 30  | 1.14 | 0.40  |
| 20 | 3 | F  | 40-48   | 2.17  | 0.56 | 57  | 1.04 | 0.47  |
| 20 | 3 | F  | 48-55   | 2.00  | 0.47 | 25  | 1.63 | 0.54  |
| 20 | 3 | F  | 55-65   | 2.42  | 0.69 | 124 | 0.71 | 0.49  |
